# Supplementary material for: Isocoumarins and benzofurans from the mangrove endophytic fungus Talaromyces amestolkiae possess α-glucosidase inhibitory and antibacterial activities
Source: Royal Society of Chemistry journal article supplement (doi:10.1039/c6ra02566h), 2016-01-01
Supplement: c6ra02566h1.pdf [file c6ra02566h1.pdf]

## Supporting Information

### Isocoumarins and Benzofurans from the Mangrove Endophytic Fungus

### *Talaromyces amestolkiae* Possessing $\alpha$ -Glucosidase Inhibitory and Antibacterial

### Activities

Senhua Chen<sup>1</sup>, Yayue Liu<sup>1</sup>, Zhaoming Liu<sup>1</sup>, Runlin Cai<sup>1</sup>, Yongjun Lu<sup>2,3</sup>, Xishan Huang<sup>1,\*</sup> and Zhigang She<sup>1,2,\*</sup>

### Affiliation

<sup>1</sup> School of Chemistry and Chemical Engineering, Sun Yat-Sen University, Guangzhou 510275, China

<sup>2</sup> Key Laboratory of Functional Molecules from Oceanic Microorganisms (Sun Yat-Sen University), Department of Education of Guangdong Province, Guangzhou 510080, China

<sup>3</sup>School of Life Sciences and Biomedical Center, Sun Yat-Sen University, Guangzhou 510275, China;

### Correspondence

Dr. Xishan Huang, E-mail: huangxishan13@foxmail.com; Prof. Zhigang She, School of Chemistry and Chemical Engineering, Sun Yat-Sen University, 135 West Xingang Road, Guangzhou 510275, P. R. China. E-mail: ceshzhg@mail.sysu.edu.cn. Tel/Fax: +86 20 84113356.

|                                                                                                         |    |
|---------------------------------------------------------------------------------------------------------|----|
| Fig. S1 HREIMS spectrum of <b>1</b> .....                                                               | 4  |
| Fig. S2 <sup>1</sup> H NMR spectrum of <b>1</b> in CDCl <sub>3</sub> .....                              | 4  |
| Fig. S3 <sup>13</sup> C NMR spectrum of <b>1</b> in CDCl <sub>3</sub> .....                             | 5  |
| Fig. S4 HSQC spectrum of <b>1</b> in CDCl <sub>3</sub> .....                                            | 5  |
| Fig. S5 <sup>1</sup> H– <sup>1</sup> H COSY spectrum of <b>1</b> in CDCl <sub>3</sub> .....             | 6  |
| Fig. S6 HMBC spectrum of <b>1</b> in CDCl <sub>3</sub> .....                                            | 6  |
| Fig. S7 HRESIMS spectrum of <b>2</b> in CDCl <sub>3</sub> .....                                         | 7  |
| Fig. S8 <sup>1</sup> H NMR spectrum of <b>2</b> in CDCl <sub>3</sub> .....                              | 7  |
| Fig. S9 <sup>13</sup> C NMR spectrum of <b>2</b> in CDCl <sub>3</sub> .....                             | 8  |
| Fig. S10 HSQC spectrum of <b>2</b> in CDCl <sub>3</sub> .....                                           | 8  |
| Fig. S11 <sup>1</sup> H– <sup>1</sup> H COSY spectrum of <b>2</b> in CDCl <sub>3</sub> .....            | 9  |
| Fig. S12 HMBC spectrum of <b>2</b> in CDCl <sub>3</sub> .....                                           | 9  |
| Fig. S13 HRESIMS spectrum of <b>3</b> .....                                                             | 10 |
| Fig. S14 <sup>1</sup> H NMR spectrum of <b>3</b> in DMSO- <i>d</i> <sub>6</sub> .....                   | 10 |
| Fig. S15 <sup>13</sup> C NMR spectrum of <b>3</b> in DMSO- <i>d</i> <sub>6</sub> .....                  | 11 |
| Fig. S16 HSQC spectrum of <b>3</b> in DMSO- <i>d</i> <sub>6</sub> .....                                 | 11 |
| Fig. S17 <sup>1</sup> H– <sup>1</sup> H COSY spectrum of <b>3</b> in DMSO- <i>d</i> <sub>6</sub> .....  | 12 |
| Fig. S18 HMBC spectrum of <b>3</b> in DMSO- <i>d</i> <sub>6</sub> .....                                 | 12 |
| Fig. S19 HRESIMS spectrum of <b>4</b> .....                                                             | 13 |
| Fig. S20 <sup>1</sup> H NMR spectrum of <b>4</b> in DMSO- <i>d</i> <sub>6</sub> .....                   | 13 |
| Fig. S21 <sup>13</sup> C NMR spectrum of <b>4</b> in DMSO- <i>d</i> <sub>6</sub> .....                  | 14 |
| Fig. S22 HSQC spectrum of <b>4</b> in DMSO- <i>d</i> <sub>6</sub> .....                                 | 14 |
| Fig. S23 <sup>1</sup> H– <sup>1</sup> H COSY spectrum of <b>4</b> in DMSO- <i>d</i> <sub>6</sub> .....  | 15 |
| Fig. S24 HMBC spectrum of <b>4</b> in DMSO- <i>d</i> <sub>6</sub> .....                                 | 15 |
| Fig. S25 HRESIMS spectrum of <b>14</b> .....                                                            | 16 |
| Fig. S26 <sup>1</sup> H NMR spectrum of <b>14</b> in MeOH- <i>d</i> <sub>4</sub> .....                  | 16 |
| Fig. S27 <sup>13</sup> C NMR spectrum of <b>14</b> in MeOH- <i>d</i> <sub>4</sub> .....                 | 17 |
| Fig. S28 HSQC spectrum of <b>14</b> in MeOH- <i>d</i> <sub>4</sub> .....                                | 17 |
| Fig. S29 <sup>1</sup> H– <sup>1</sup> H COSY spectrum of <b>14</b> in MeOH- <i>d</i> <sub>4</sub> ..... | 18 |
| Fig. S30 HMBC spectrum of <b>14</b> in MeOH- <i>d</i> <sub>4</sub> .....                                | 18 |

|                                                                                                         |    |
|---------------------------------------------------------------------------------------------------------|----|
| Fig. S31 HRESIMS spectrum of <b>15</b> .....                                                            | 19 |
| Fig. S32 <sup>1</sup> H NMR spectrum of <b>15</b> in MeOH- <i>d</i> <sub>4</sub> .....                  | 19 |
| Fig. S33 <sup>13</sup> C NMR spectrum of <b>15</b> in MeOH- <i>d</i> <sub>4</sub> .....                 | 20 |
| Fig. S34 HSQC spectrum of <b>15</b> in MeOH- <i>d</i> <sub>4</sub> .....                                | 20 |
| Fig. S35 <sup>1</sup> H- <sup>1</sup> H COSY spectrum of <b>15</b> in MeOH- <i>d</i> <sub>4</sub> ..... | 21 |
| Fig. S36 HMBC spectrum of <b>15</b> in MeOH- <i>d</i> <sub>4</sub> .....                                | 21 |
| Fig. S37 HRESIMS spectrum of <b>16</b> .....                                                            | 22 |
| Fig. S38 <sup>1</sup> H NMR spectrum of <b>16</b> in MeOH- <i>d</i> <sub>4</sub> .....                  | 22 |
| Fig. S39 <sup>13</sup> C NMR spectrum of <b>16</b> in MeOH- <i>d</i> <sub>4</sub> .....                 | 23 |
| Fig. S40 HSQC spectrum of <b>16</b> in MeOH- <i>d</i> <sub>4</sub> .....                                | 23 |
| Fig. S41 <sup>1</sup> H- <sup>1</sup> H COSY spectrum of <b>16</b> in MeOH- <i>d</i> <sub>4</sub> ..... | 24 |
| Fig. S42 HMBC spectrum of <b>16</b> in MeOH- <i>d</i> <sub>4</sub> .....                                | 24 |
| Fig. S43 HRESIMS spectrum of <b>17</b> .....                                                            | 25 |
| Fig. S44 <sup>1</sup> H NMR spectrum of <b>17</b> in MeOH- <i>d</i> <sub>4</sub> .....                  | 25 |
| Fig. S45 <sup>13</sup> C NMR spectrum of <b>17</b> in MeOH- <i>d</i> <sub>4</sub> .....                 | 26 |
| Fig. S46 HSQC spectrum of <b>17</b> in MeOH- <i>d</i> <sub>4</sub> .....                                | 26 |
| Fig. S47 <sup>1</sup> H- <sup>1</sup> H COSY spectrum of <b>17</b> in MeOH- <i>d</i> <sub>4</sub> ..... | 27 |
| Fig. S48 HMBC spectrum of <b>17</b> in MeOH- <i>d</i> <sub>4</sub> .....                                | 27 |
| Fig. S49 <sup>1</sup> H NMR spectrum of <b>4a</b> in CDCl <sub>3</sub> .....                            | 28 |
| Fig. S50 <sup>1</sup> H NMR spectrum of <b>4b</b> in CDCl <sub>3</sub> .....                            | 28 |
| Fig. S51 <sup>1</sup> H NMR spectrum of <b>14a</b> in CDCl <sub>3</sub> .....                           | 29 |
| Fig. S52 <sup>1</sup> H NMR spectrum of <b>14b</b> in CDCl <sub>3</sub> .....                           | 29 |
| Fig. S53 <sup>1</sup> H NMR spectrum of <b>15a</b> in CDCl <sub>3</sub> .....                           | 30 |
| Fig. S54 <sup>1</sup> H NMR spectrum of <b>15b</b> in CDCl <sub>3</sub> .....                           | 30 |
| Fig. S55 X-ray crystallographic analysis of compound <b>5</b> .....                                     | 31 |

**Fig. S1** HREIMS spectrum of **1**

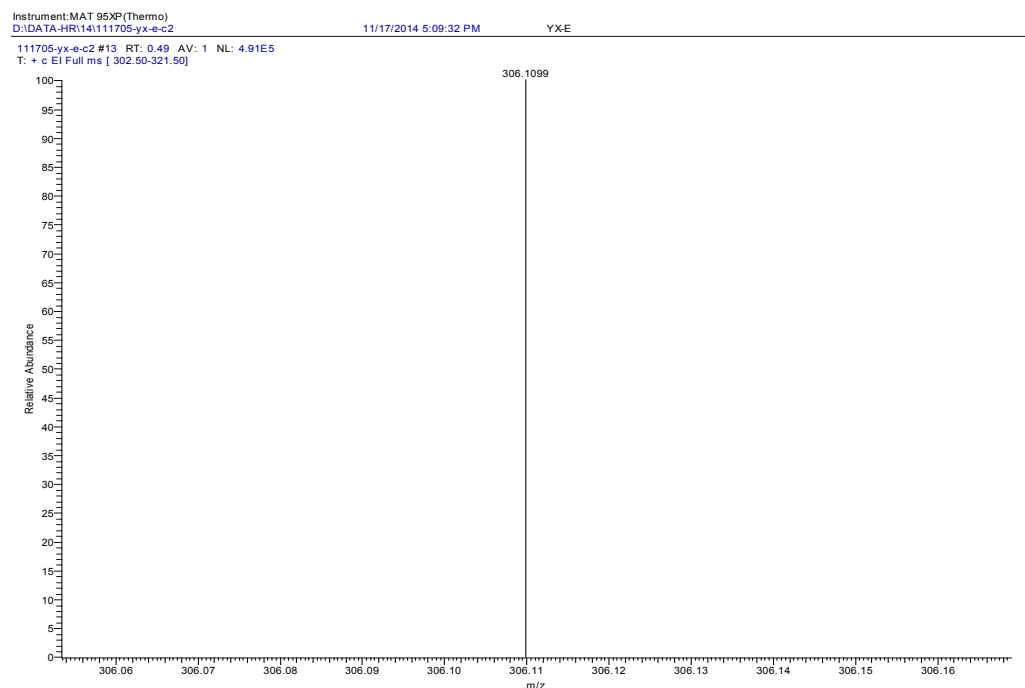

**Fig. S2**  $^1\text{H}$  NMR spectrum of **1** in  $\text{CDCl}_3$

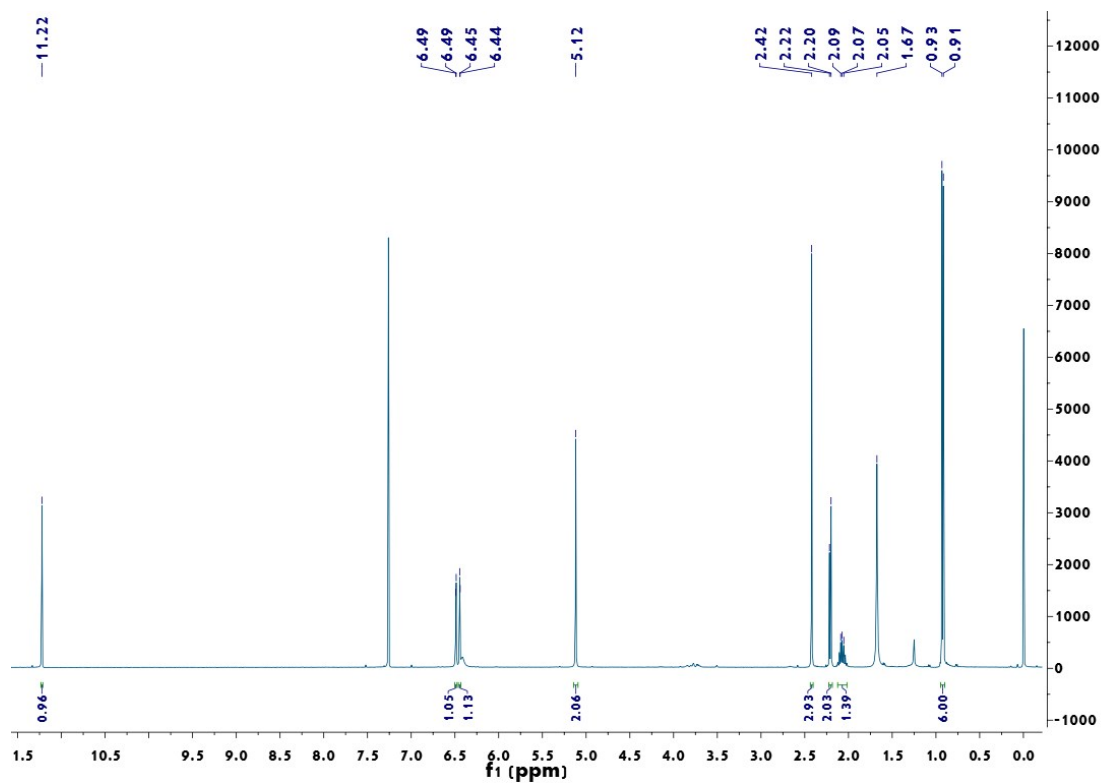

**Fig. S3**  $^{13}\text{C}$  NMR spectrum of **1** in  $\text{CDCl}_3$

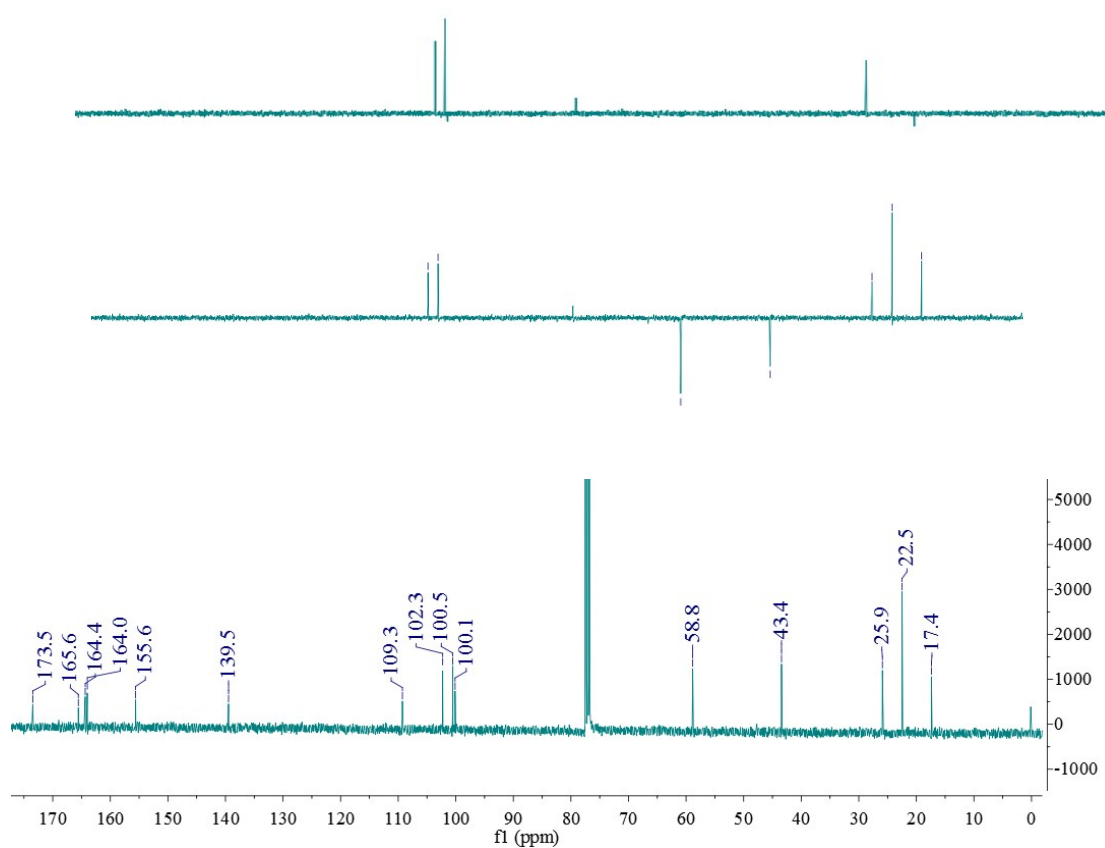

**Fig. S4** HSQC spectrum of **1** in  $\text{CDCl}_3$

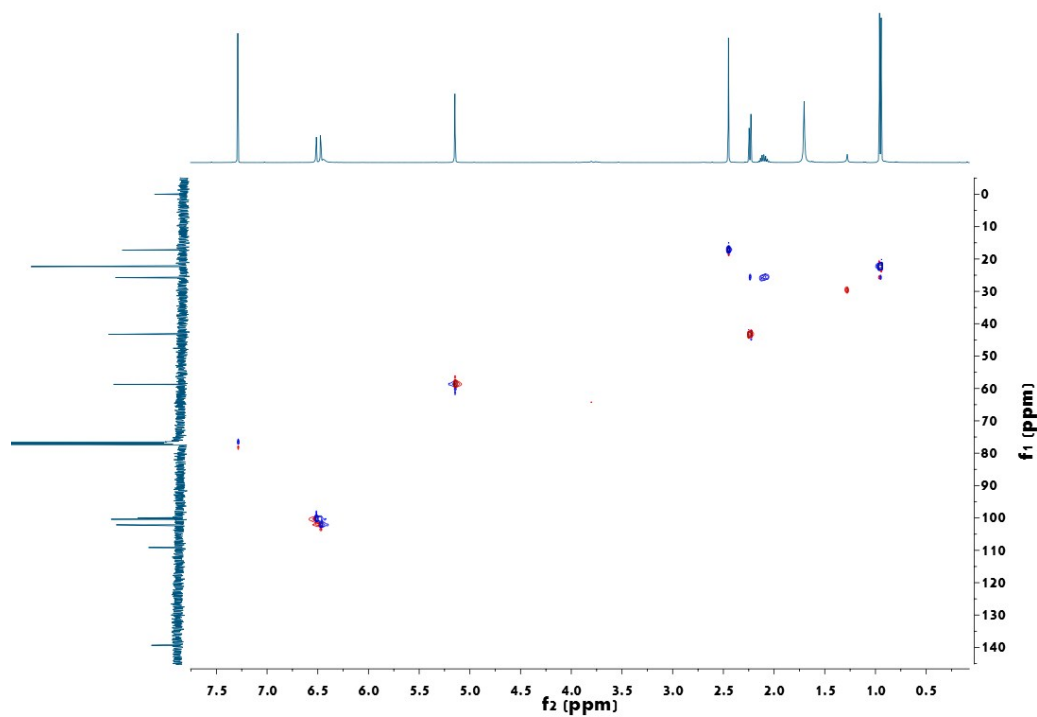

**Fig. S5**  $^1\text{H}$ - $^1\text{H}$  COSY spectrum of **1** in  $\text{CDCl}_3$

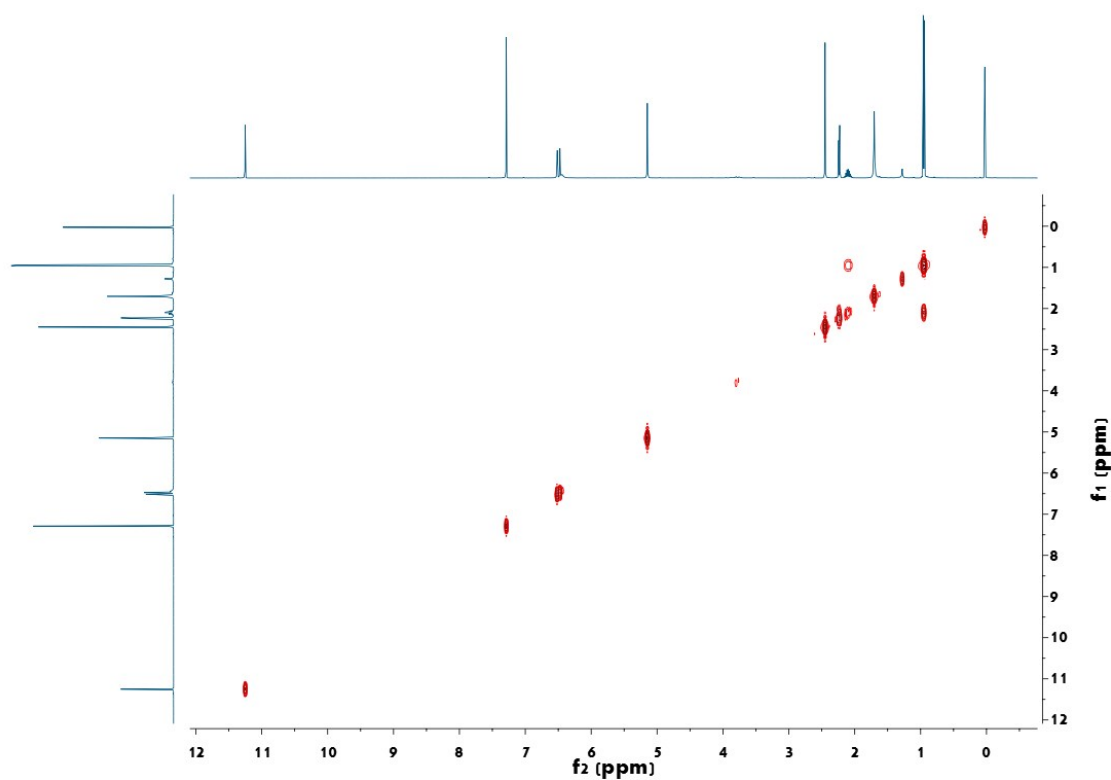

**Fig. S6** HMBC spectrum of **1** in  $\text{CDCl}_3$

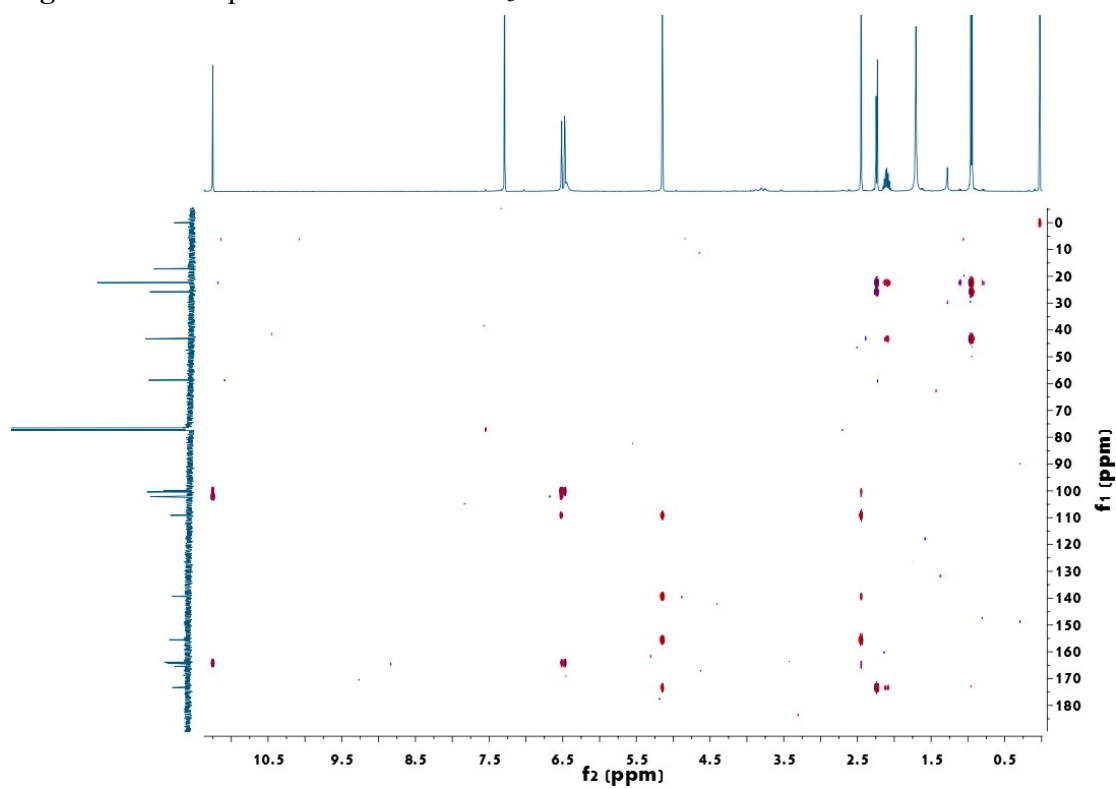

**Fig. S7** HRESIMS spectrum of **2**

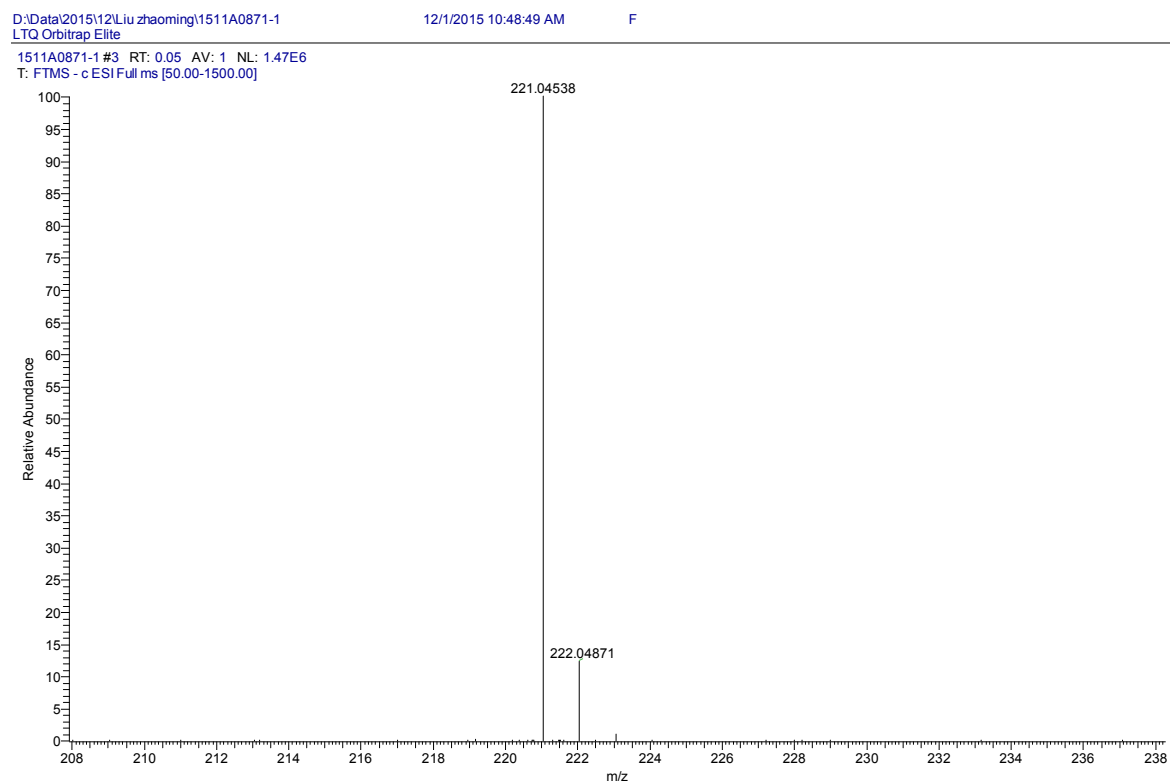

**Fig. S8**  $^1\text{H}$  NMR spectrum of **2** in  $\text{CDCl}_3$

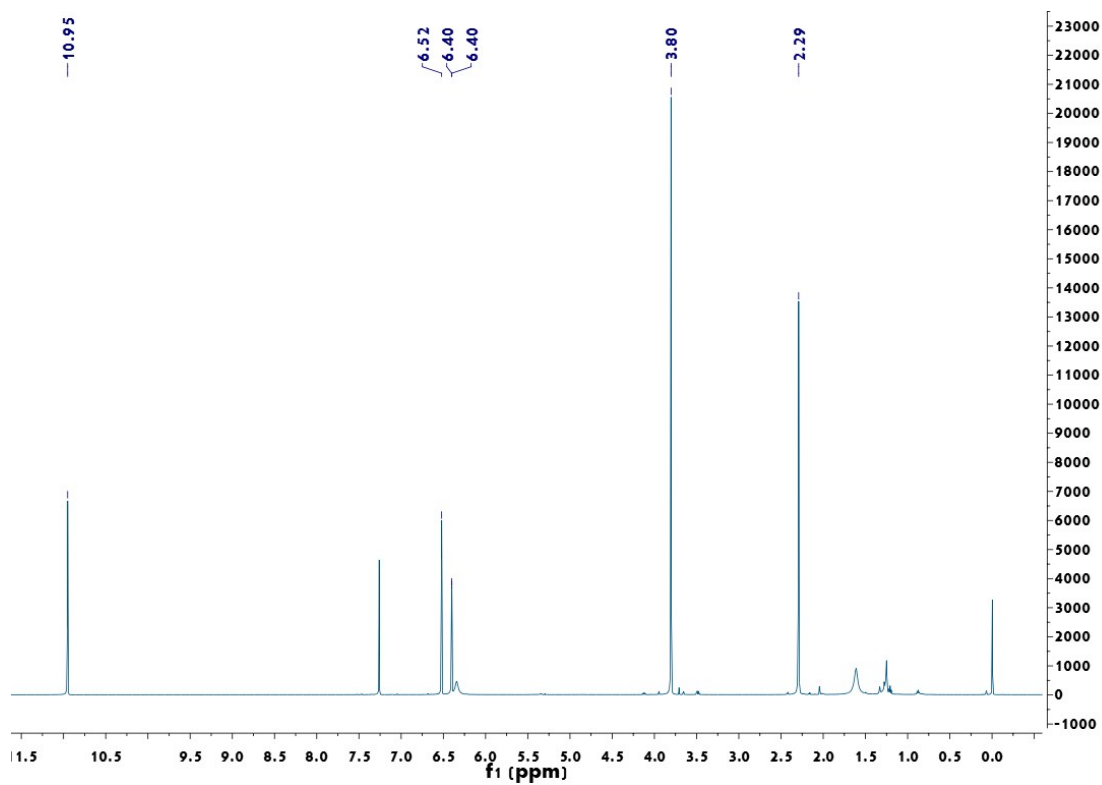

**Fig. S9**  $^{13}\text{C}$  NMR spectrum of **2** in  $\text{CDCl}_3$

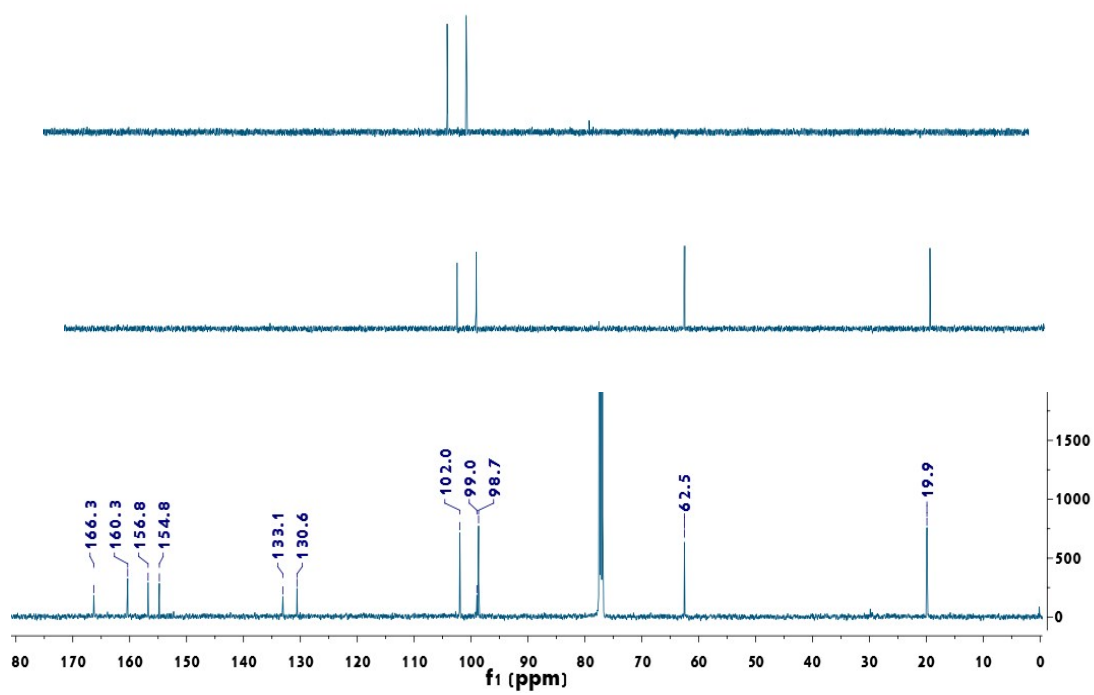

**Fig. S10** HSQC spectrum of **1** in  $\text{CDCl}_3$

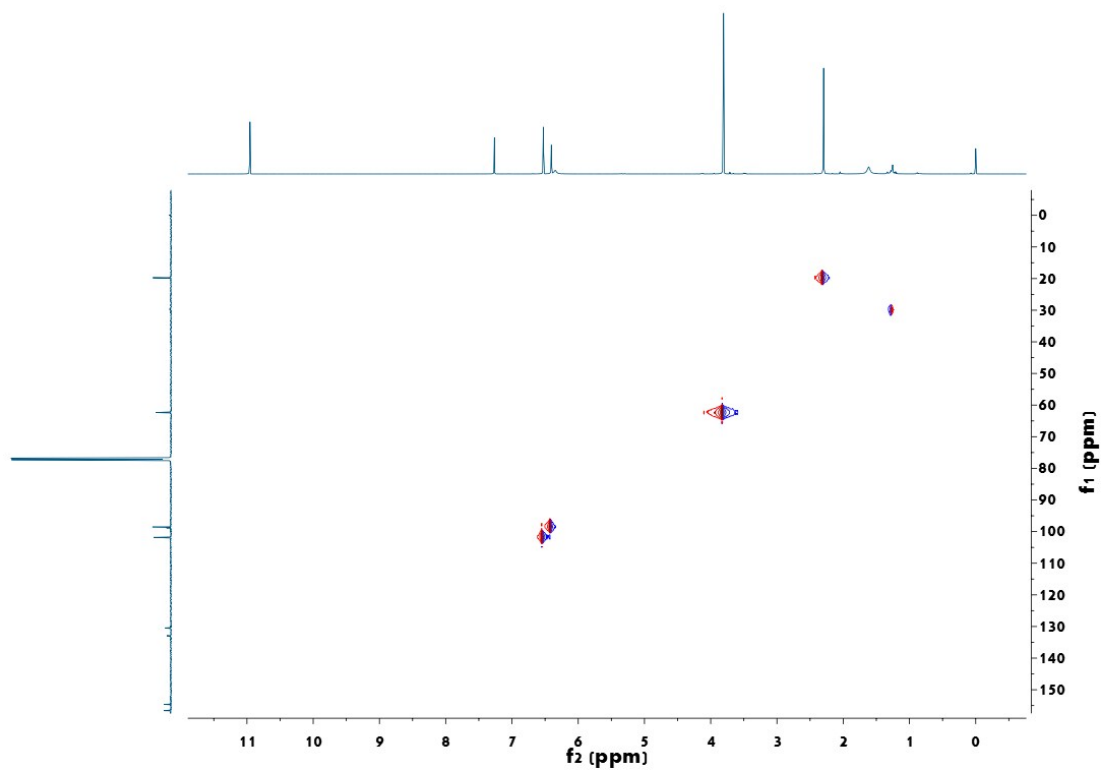



**Fig. S11**  $^1\text{H}$ - $^1\text{H}$  COSY spectrum of **2** in  $\text{CDCl}_3$

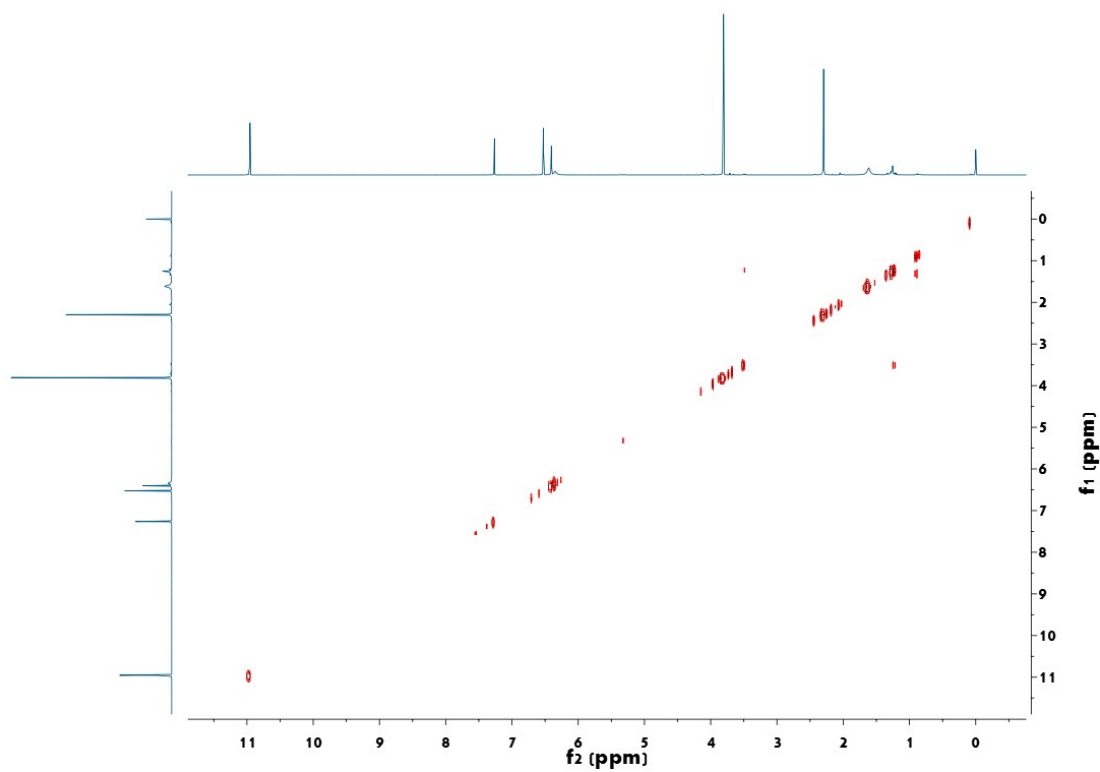

**Fig. S12** HMBC spectrum of **2** in  $\text{CDCl}_3$

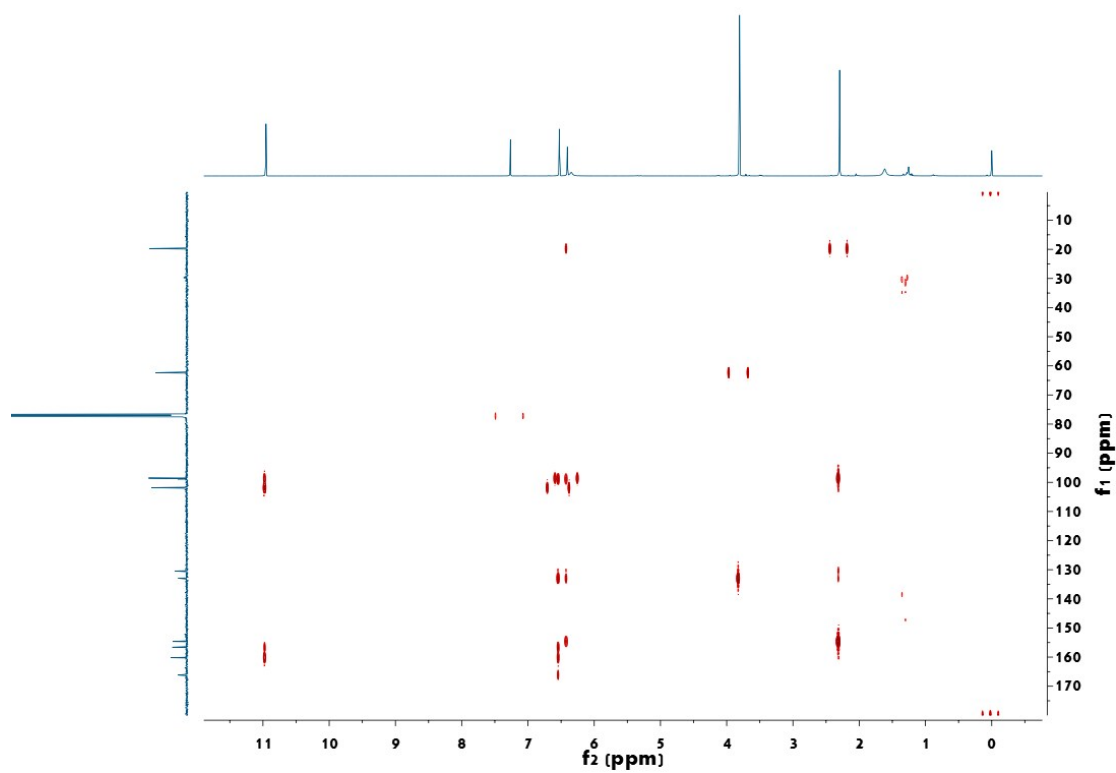

**Fig. S13** HRESIMS spectrum of **3**

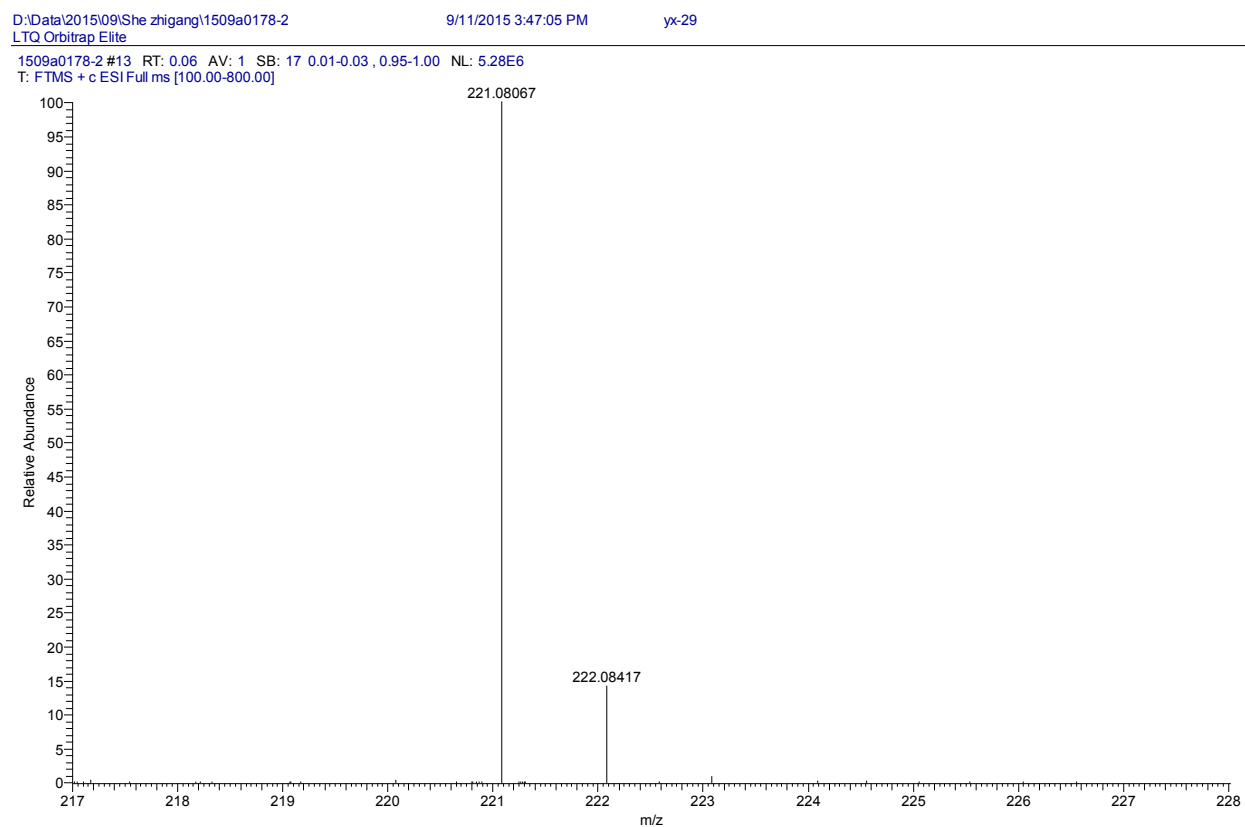

**Fig. S14**  $^1\text{H}$  NMR spectrum of **3** in  $\text{DMSO}-d_6$

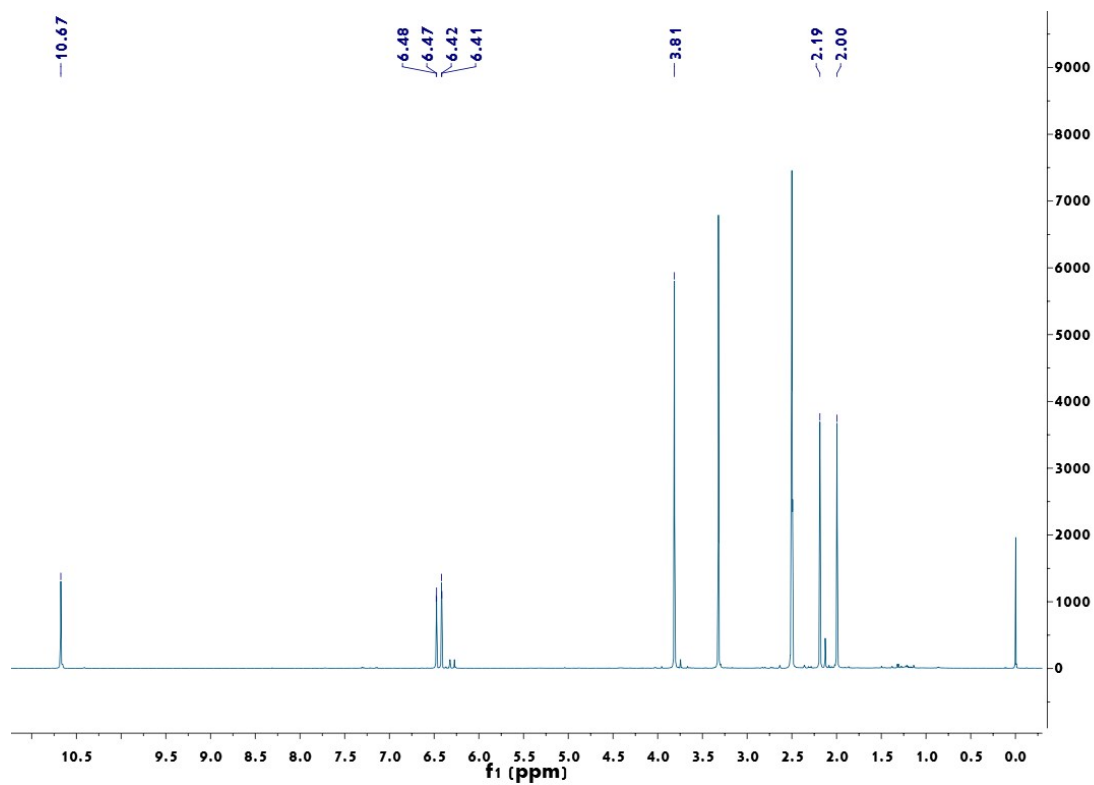

**Fig. S15**  $^{13}\text{C}$  NMR spectrum of **3** in  $\text{DMSO-}d_6$

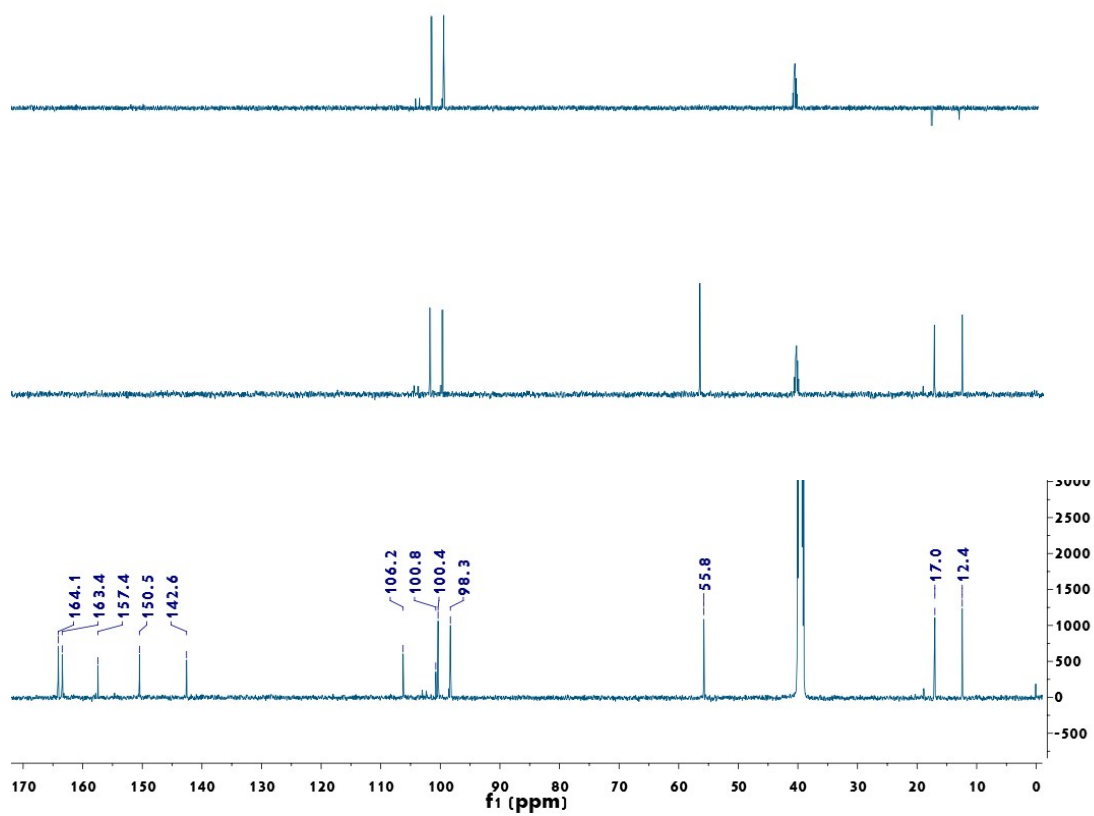

**Fig. S16** HSQC spectrum of **3** in  $\text{DMSO-}d_6$

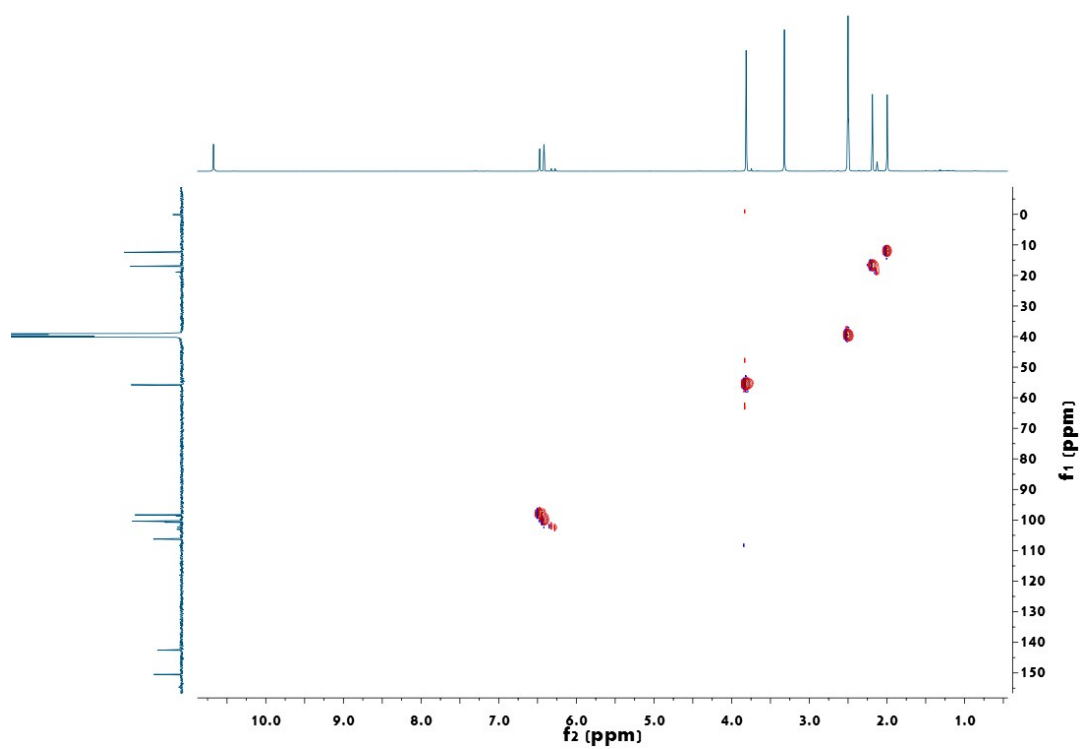

**Fig. S17**  $^1\text{H}$ - $^1\text{H}$  COSY spectrum of **3** in  $\text{DMSO-}d_6$

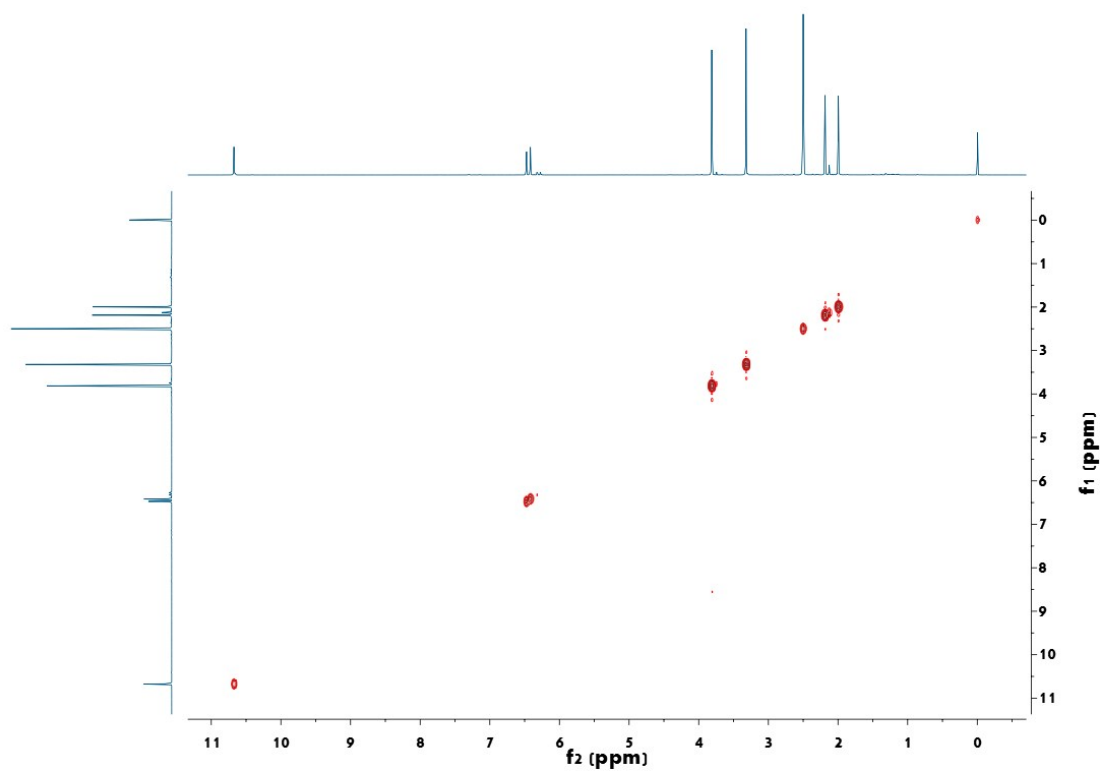

**Fig. S18** HMBC spectrum of **3** in  $\text{DMSO-}d_6$

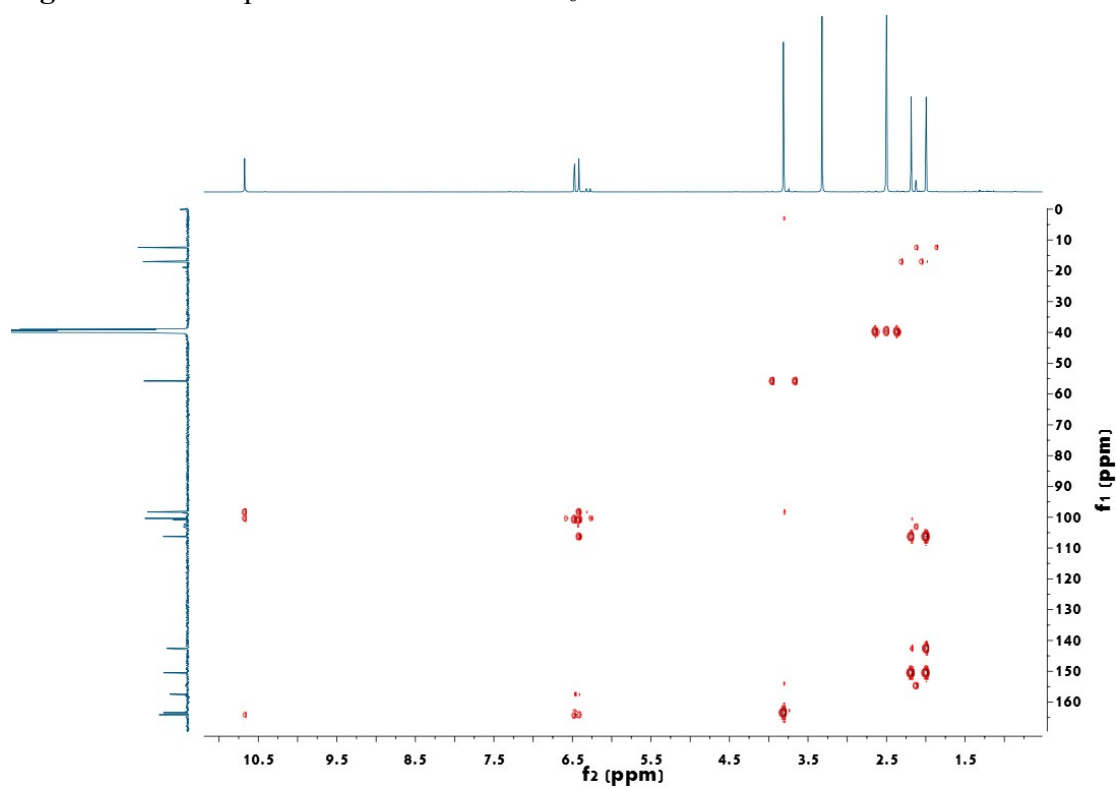

**Fig. S19** HRESIMS spectrum of **4**

D:\Data\2015\10\She zhigang\1510A0700-4  
LTQ Orbitrap Elite

10/31/2015 5:17:15 PM

YX-11

1510A0700-4 #25-26 RT: 0.12-0.12 AV: 2 NL: 2.11E6  
T: FTMS + c ESI Full ms [100.00-1000.00]

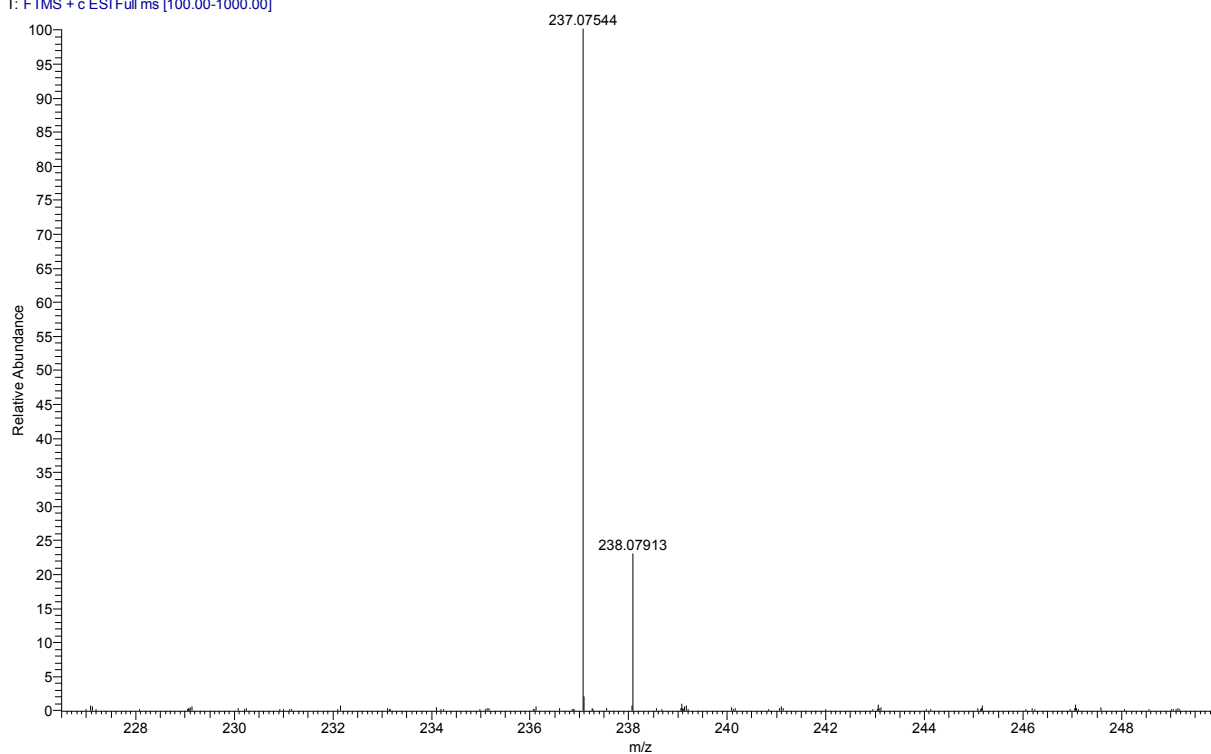

**Fig. S20**  $^1\text{H}$  NMR spectrum of **4** in  $\text{DMSO}-d_6$

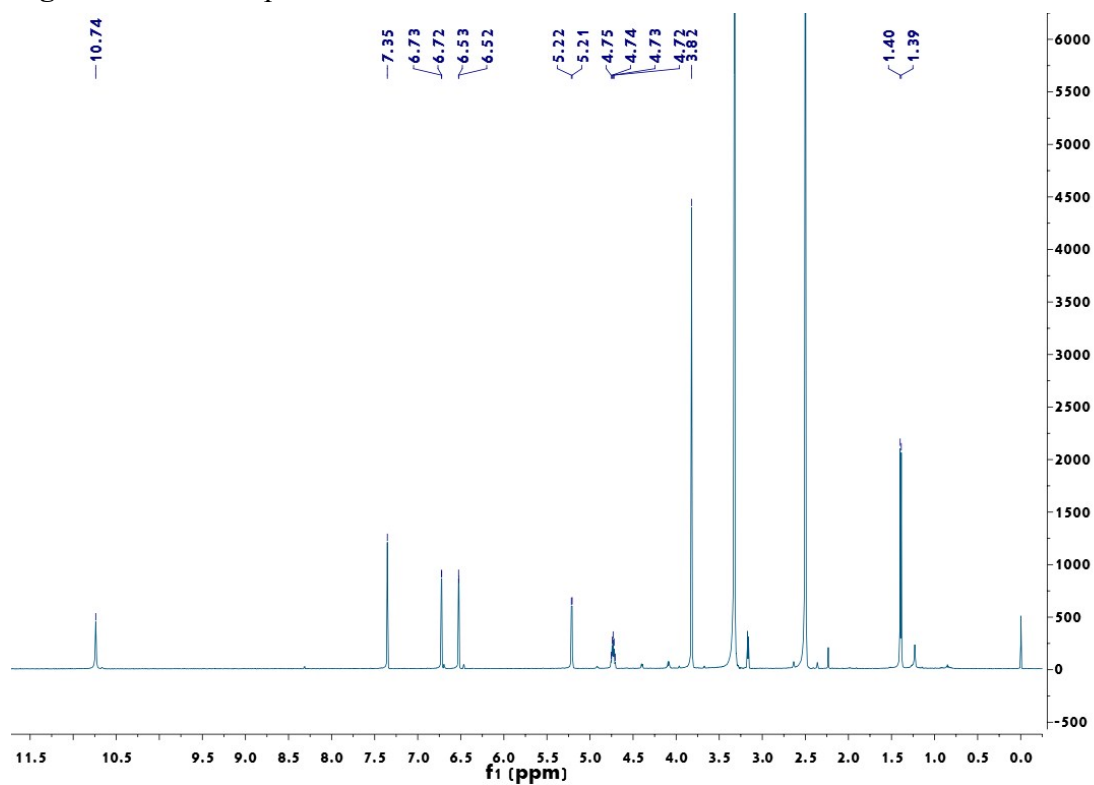

**Fig. S21**  $^{13}\text{C}$  NMR spectrum of **4** in  $\text{DMSO-}d_6$

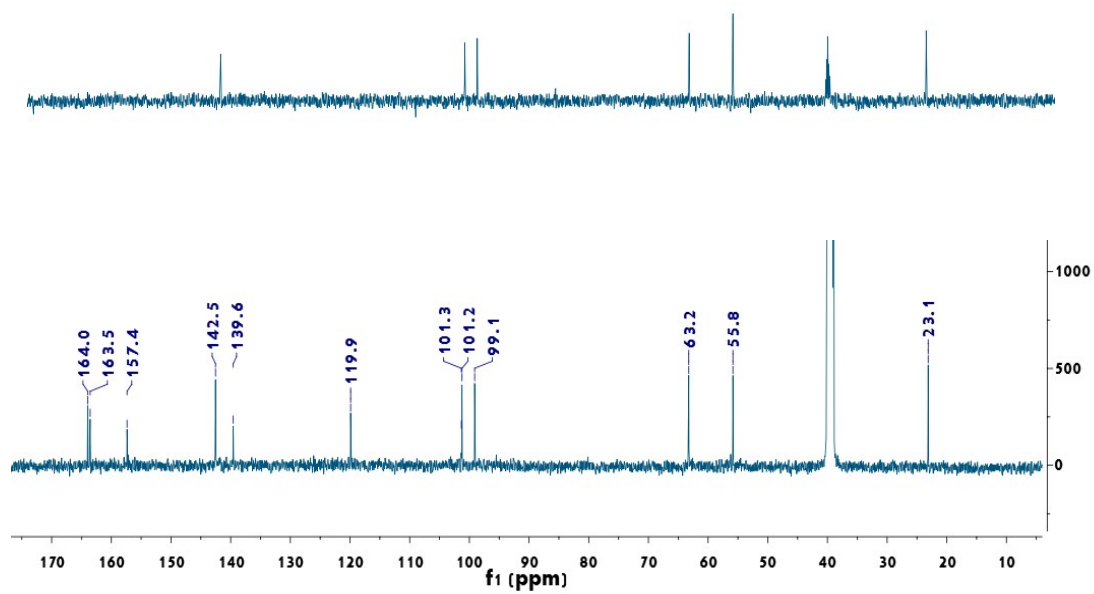

**Fig. S22** HSQC spectrum of **4** in  $\text{DMSO-}d_6$

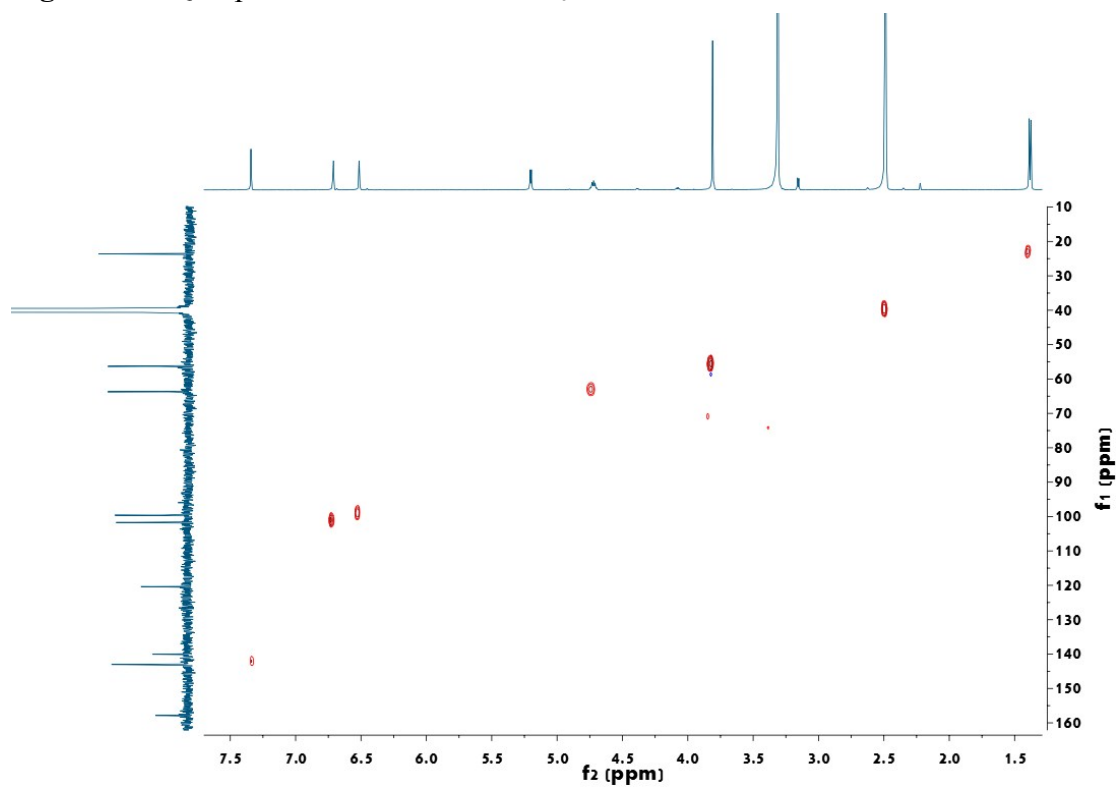

**Fig. S23**  $^1\text{H}$ - $^1\text{H}$  COSY spectrum of **4** in  $\text{DMSO-}d_6$

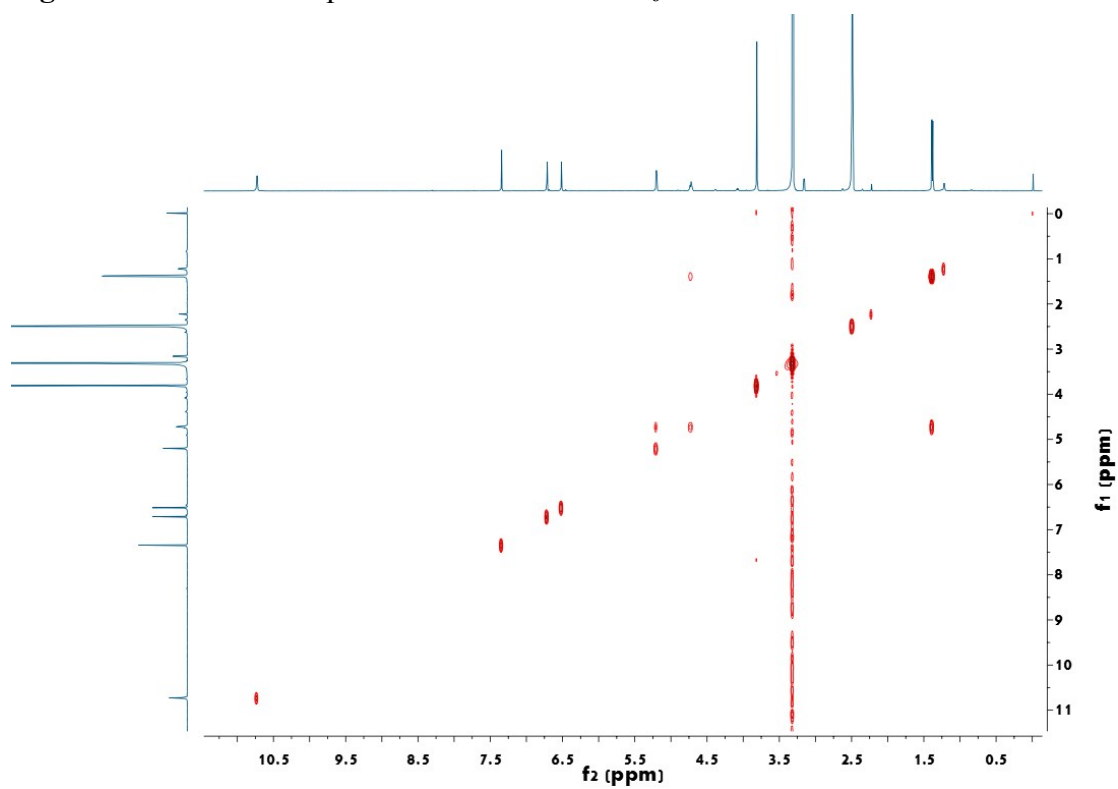

**Fig. S24** HMBC spectrum of **4** in  $\text{DMSO-}d_6$

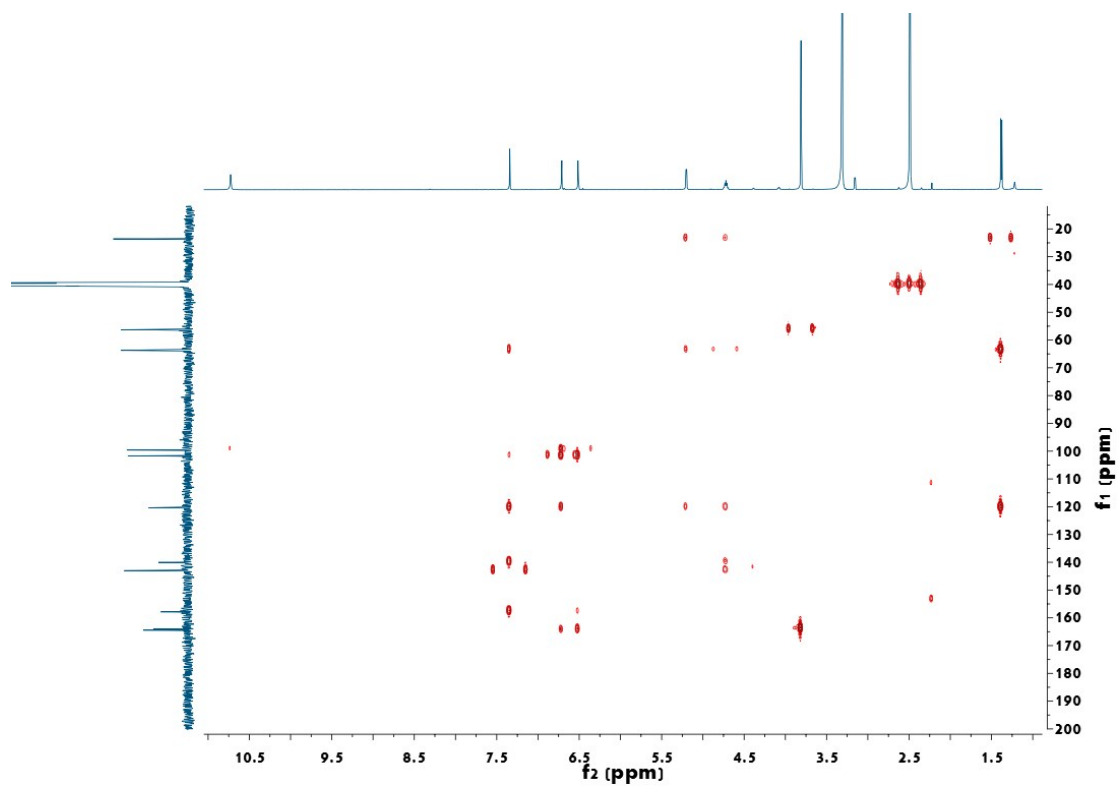

**Fig. S25** HRESIMS spectrum of **14**

D:\Data\2015\12\Chen senhua\1512A0190  
LTQ Orbitrap Elite

12/10/2015 10:00:27 AM

yx-9

1512A0190 #26-27 RT: 0.15-0.16 AV: 2 NL: 3.21E5  
T: FTMS + c ESI Full ms [200.00-1500.00]

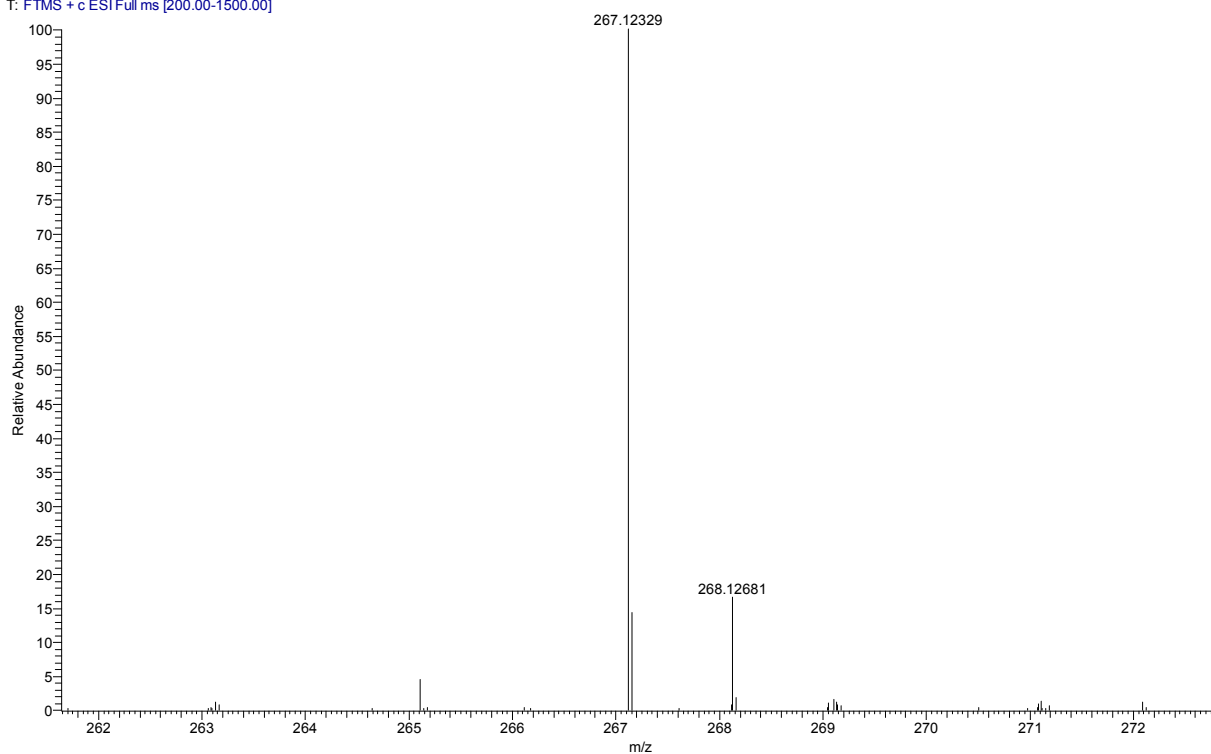

**Fig. S26**  $^1\text{H}$  NMR spectrum of **14** MeOH- $d_4$ .

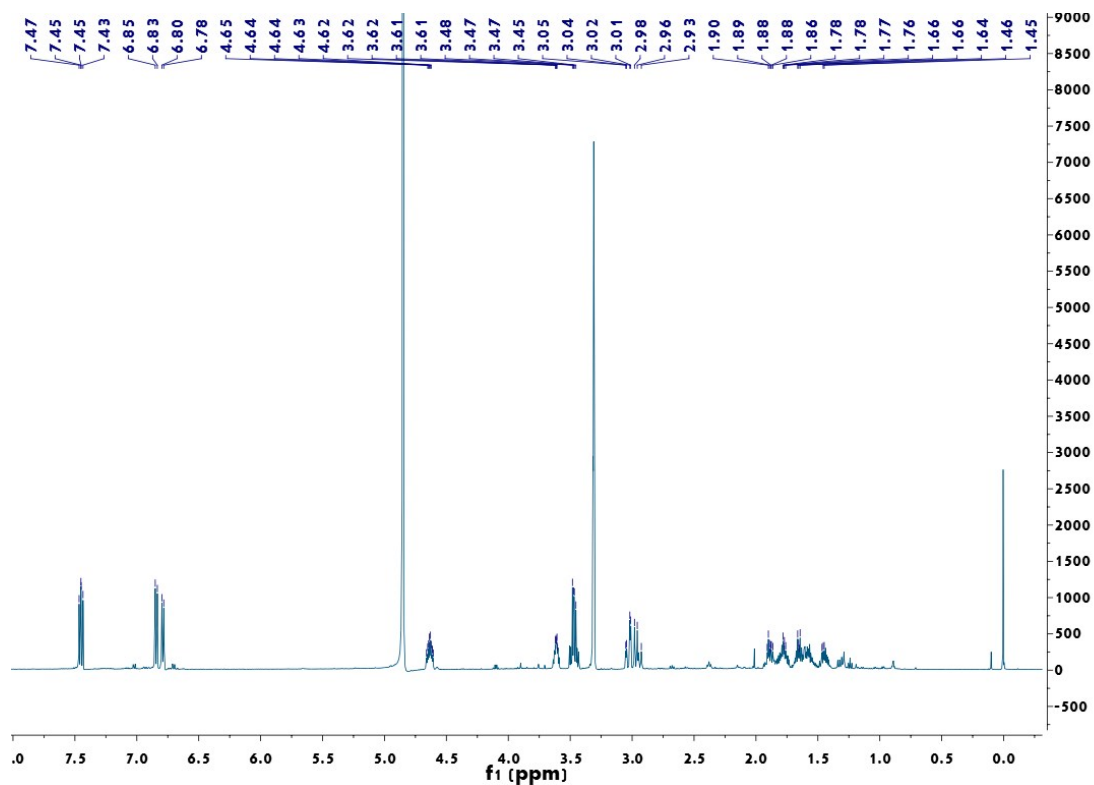



Fig. S27  $^{13}\text{C}$  NMR spectrum of **14** in  $\text{MeOH-}d_4$ .

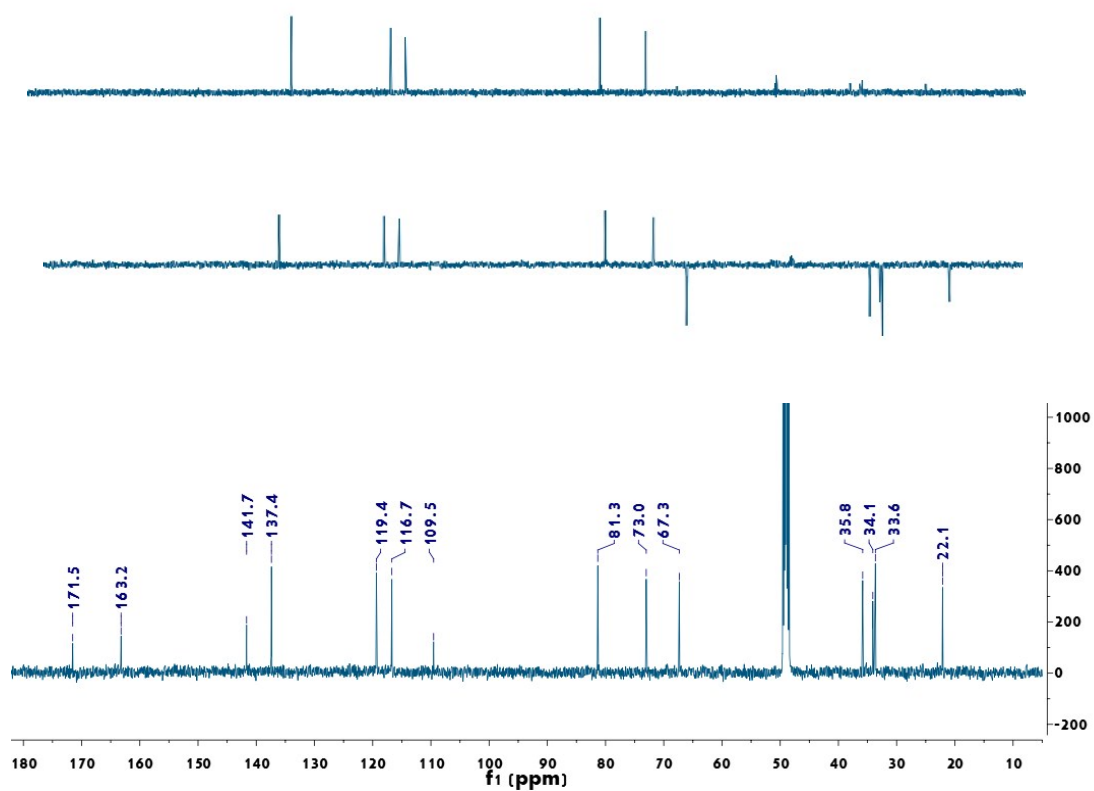

Fig. S28 HSQC spectrum of **14** in  $\text{MeOH-}d_4$ .

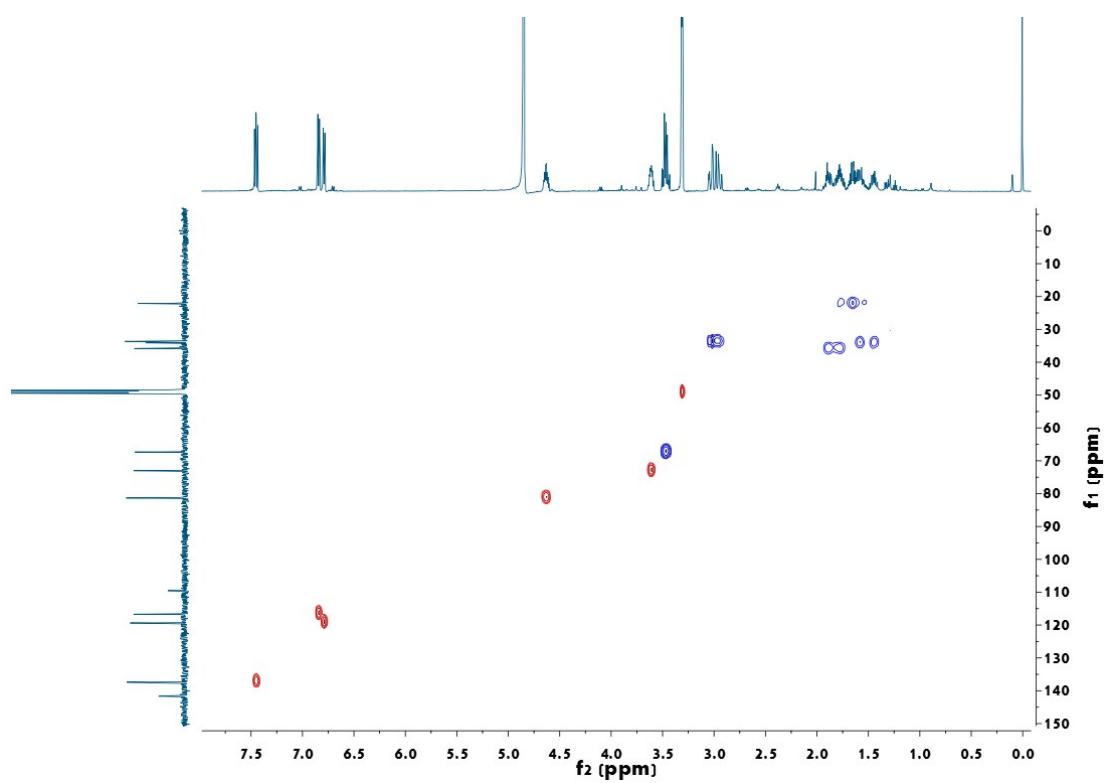

**Fig. S29**  $^1\text{H}$ - $^1\text{H}$  COSY spectrum of **14** in  $\text{MeOH-}d_4$ .

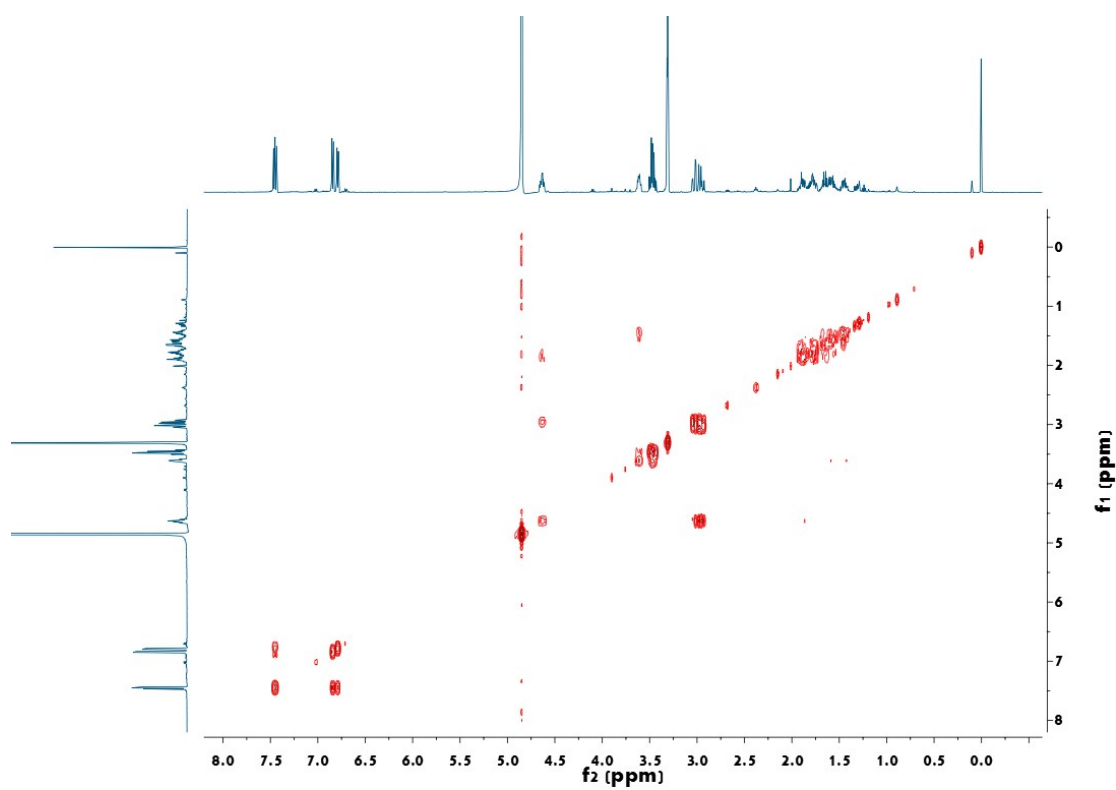

**Fig. S30** HMBC spectrum of **14** in  $\text{MeOH-}d_4$ .

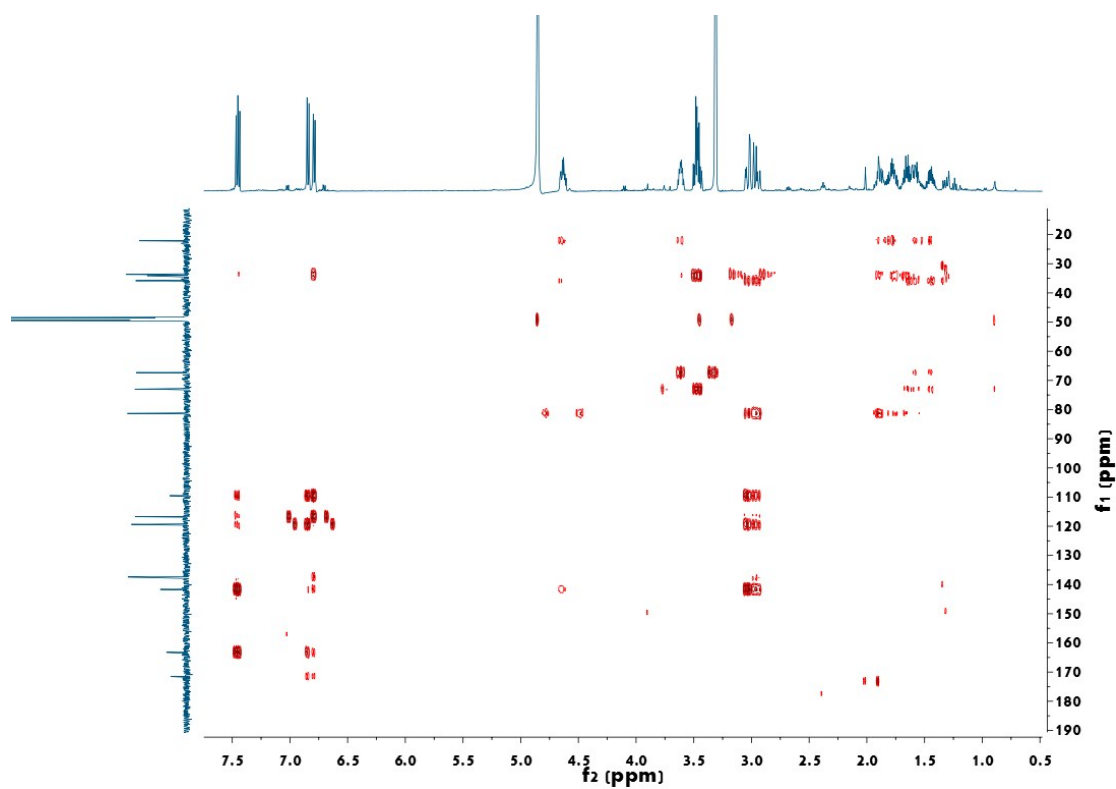

**Fig. S31** HREIMS spectrum of **15**

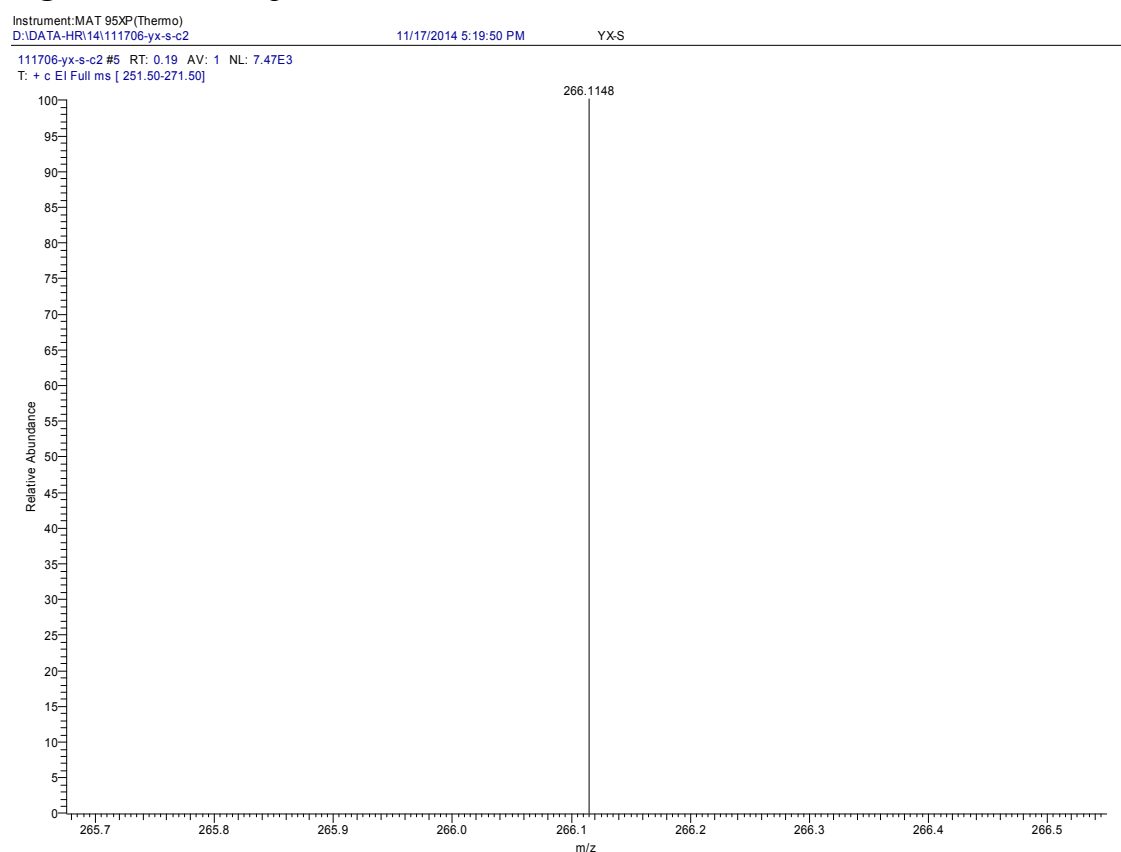

**Fig. S32**  $^1\text{H}$  NMR spectrum of **15** MeOH- $d_4$ .

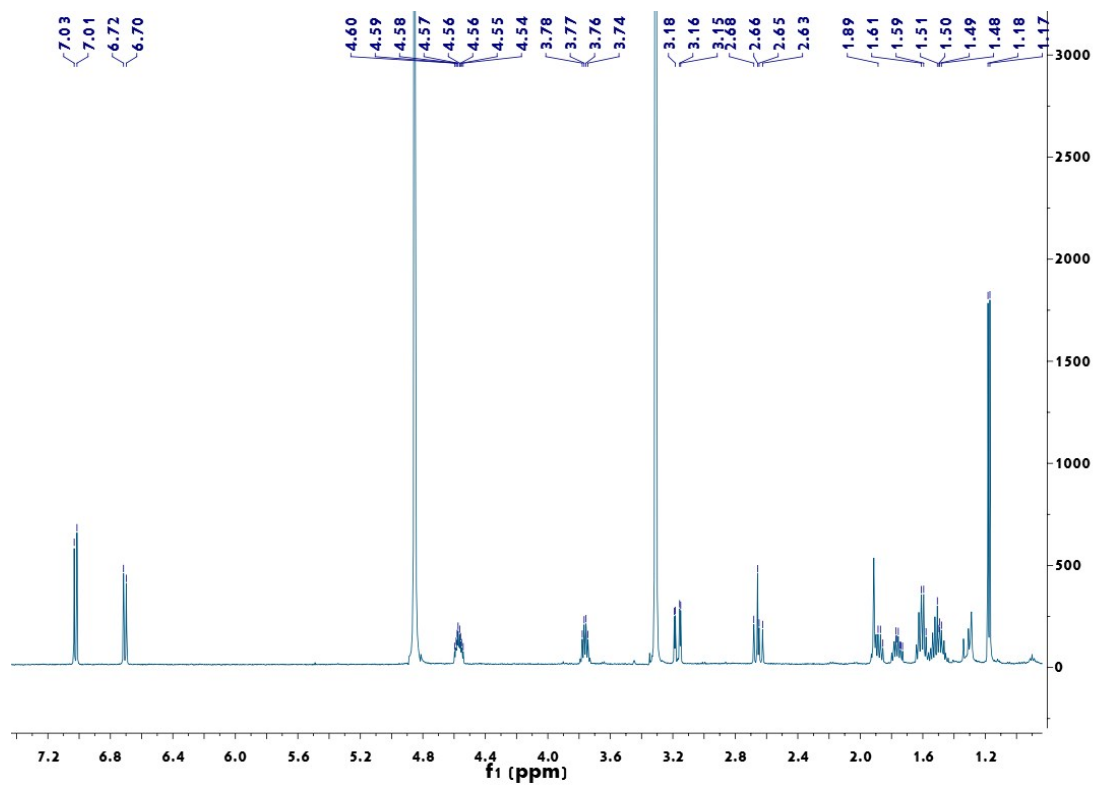

**Fig. S33**  $^{13}\text{C}$  NMR spectrum of **15** in  $\text{MeOH-}d_4$ .

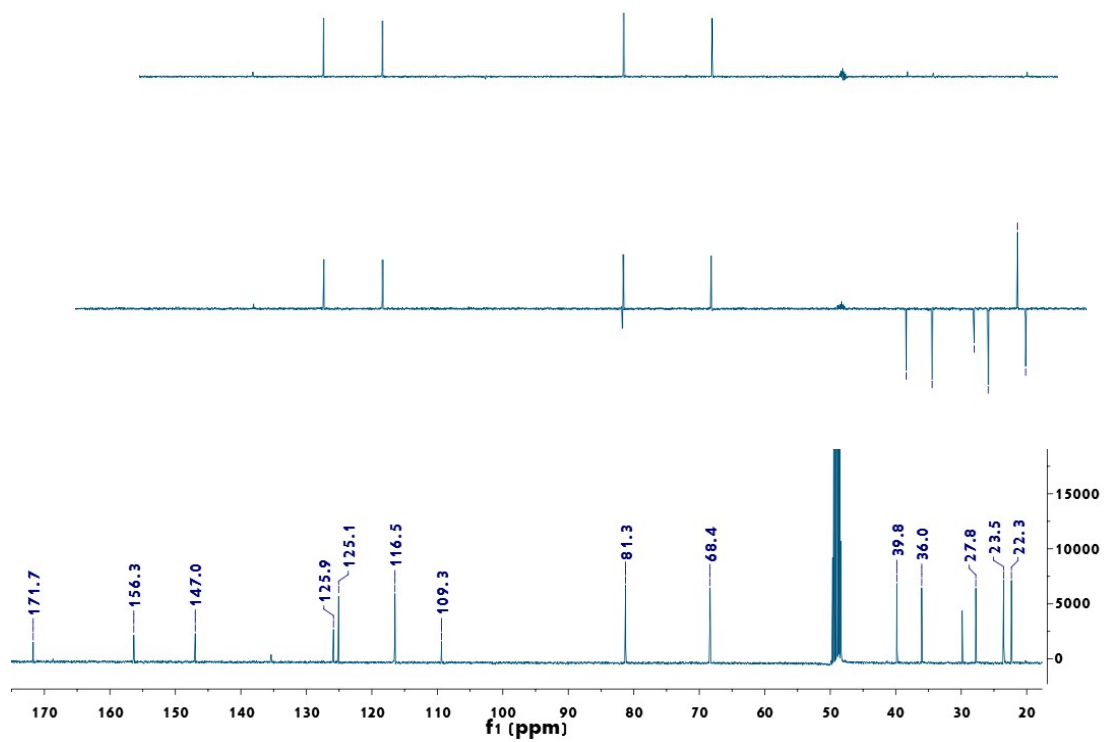

**Fig. S34** HSQC spectrum of **15** in  $\text{MeOH-}d_4$ .

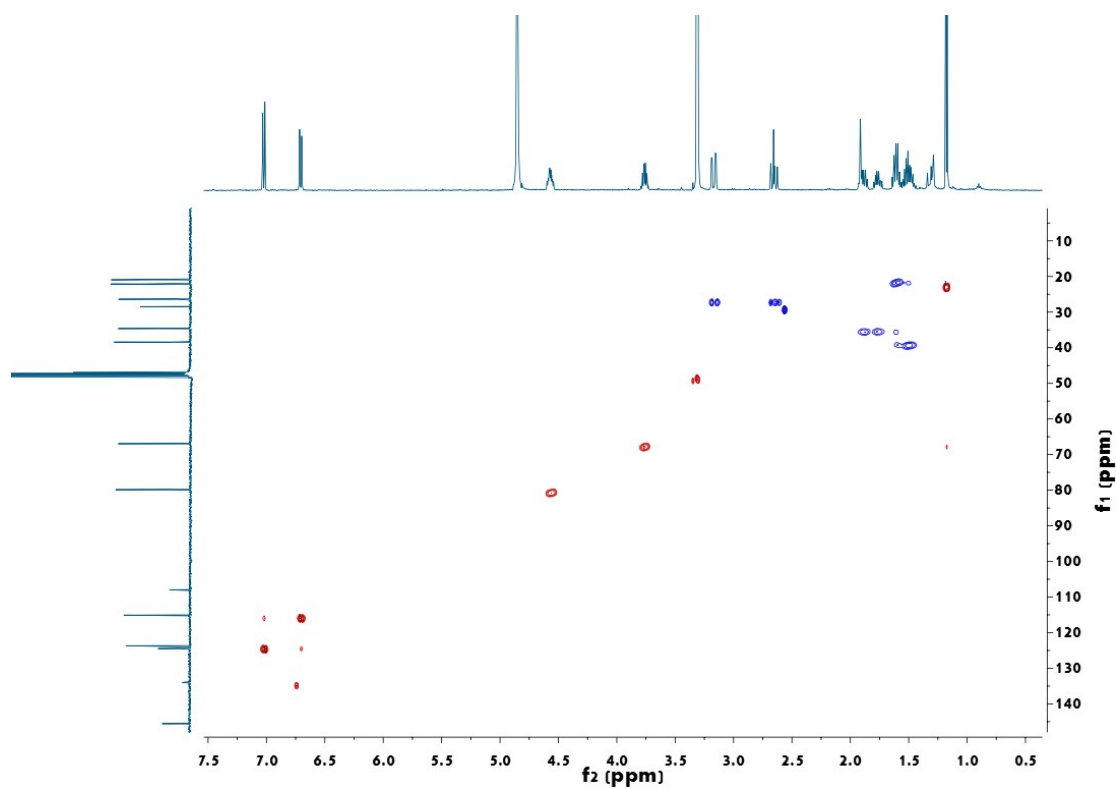

Fig. S35  $^1\text{H}$ - $^1\text{H}$  COSY spectrum of **15** in  $\text{MeOH-}d_4$ .

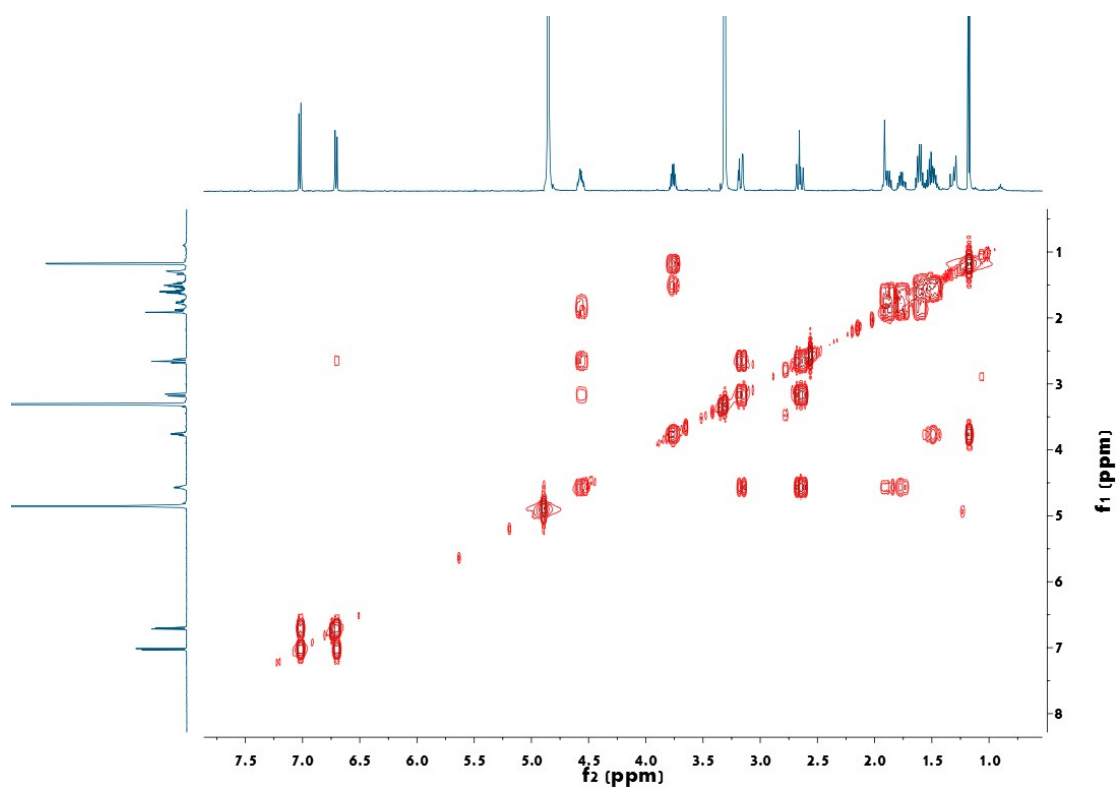

Fig. S36 HMBC spectrum of **15** in  $\text{MeOH-}d_4$ .

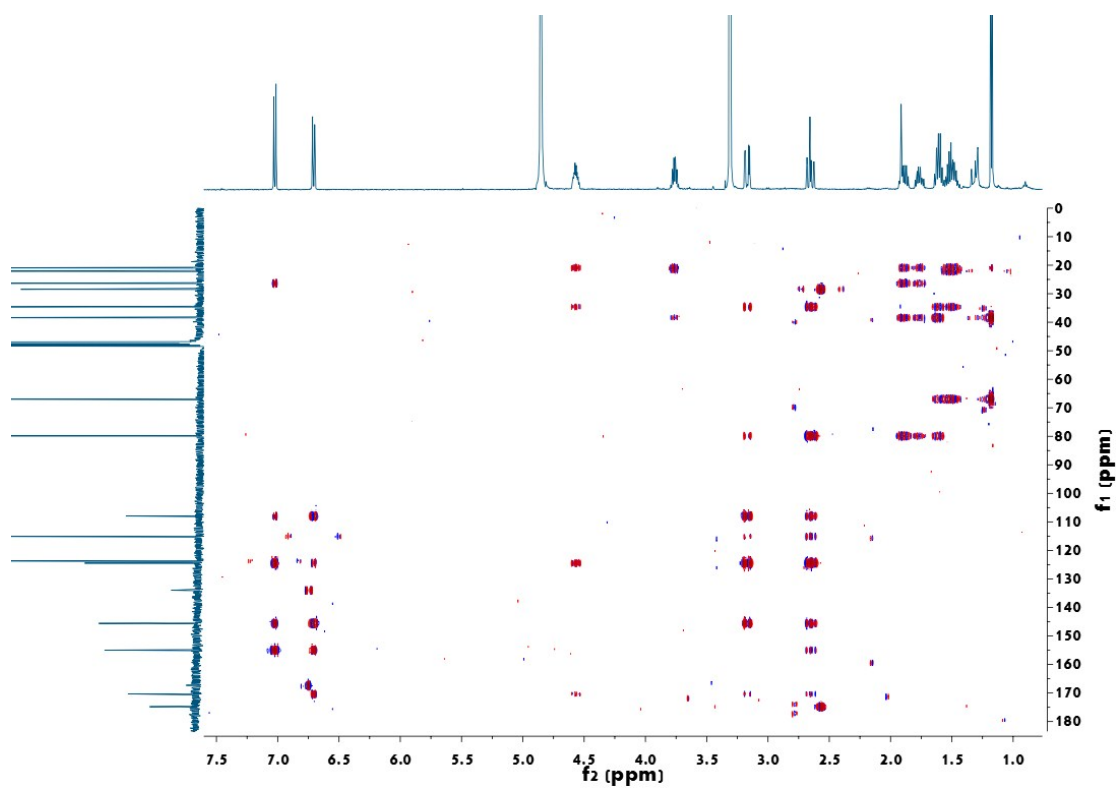

**Fig. S37** HREIMS spectrum of **16**

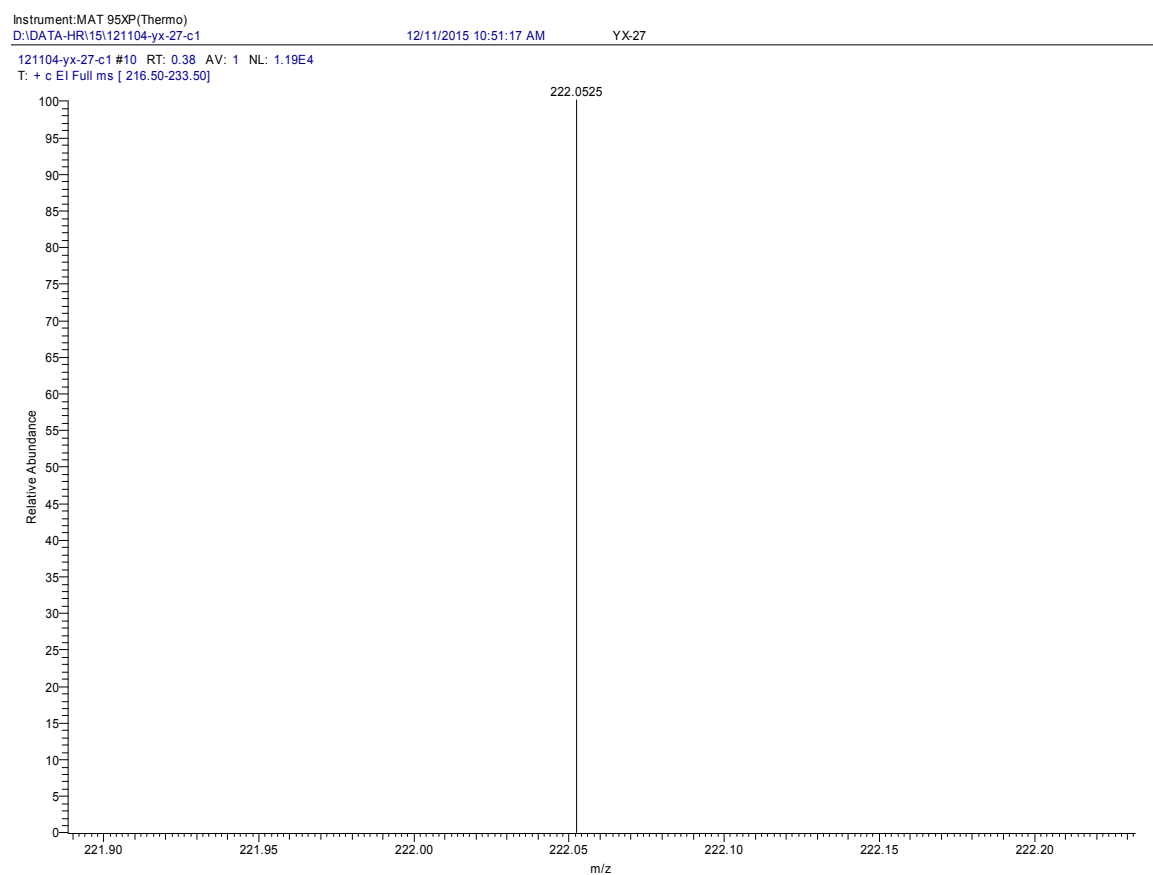

**Fig. S38**  $^1\text{H}$  NMR spectrum of **16** MeOH- $d_4$ .

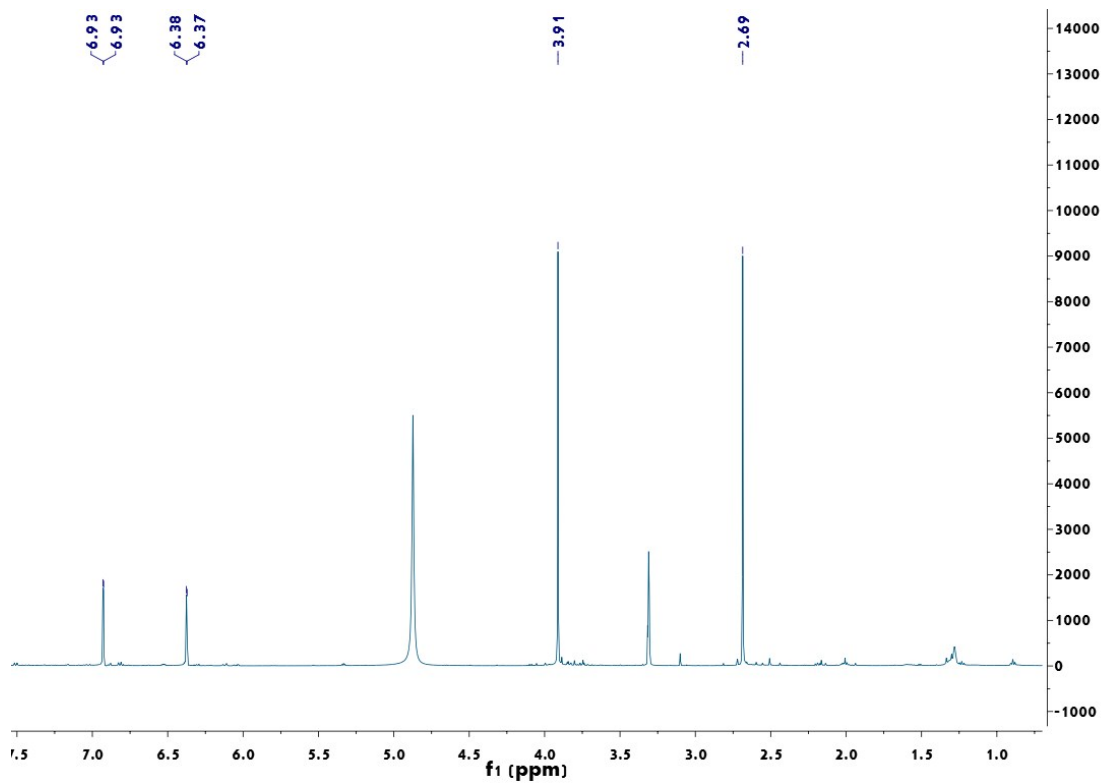

**Fig. S39**  $^{13}\text{C}$  NMR spectrum of **16** in  $\text{MeOH-}d_4$ .

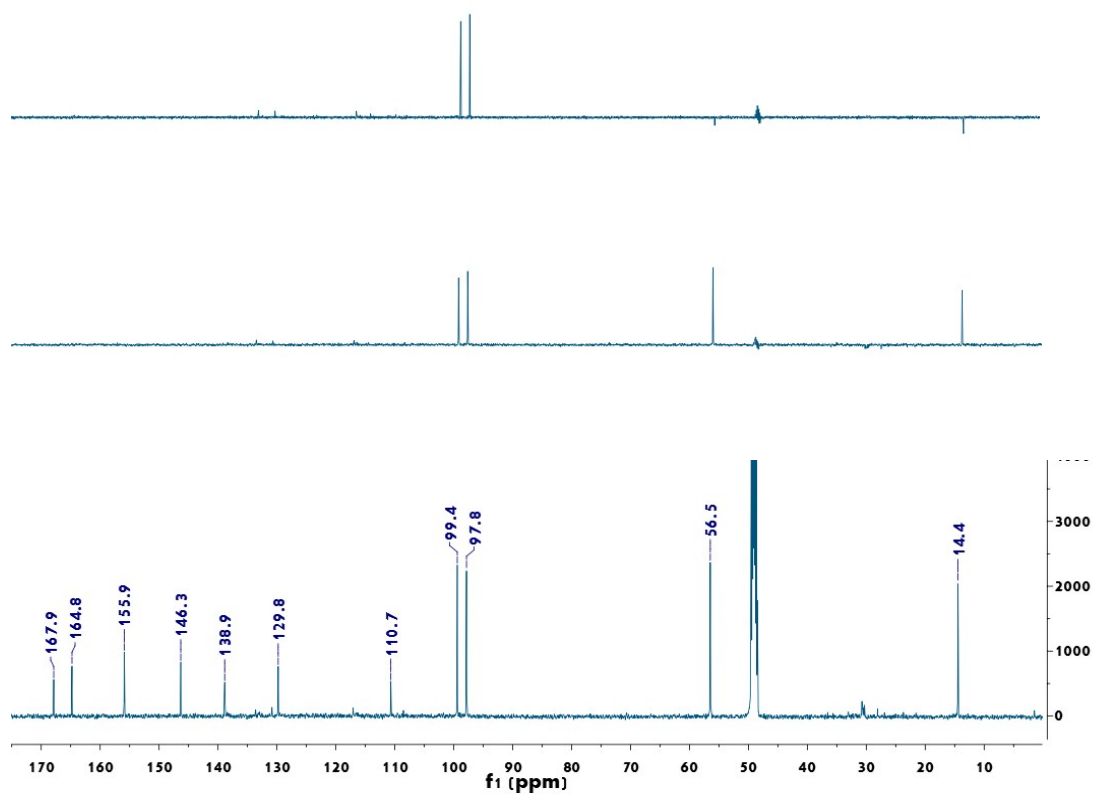

**Fig. S40** HSQC spectrum of **16** in  $\text{MeOH-}d_4$ .

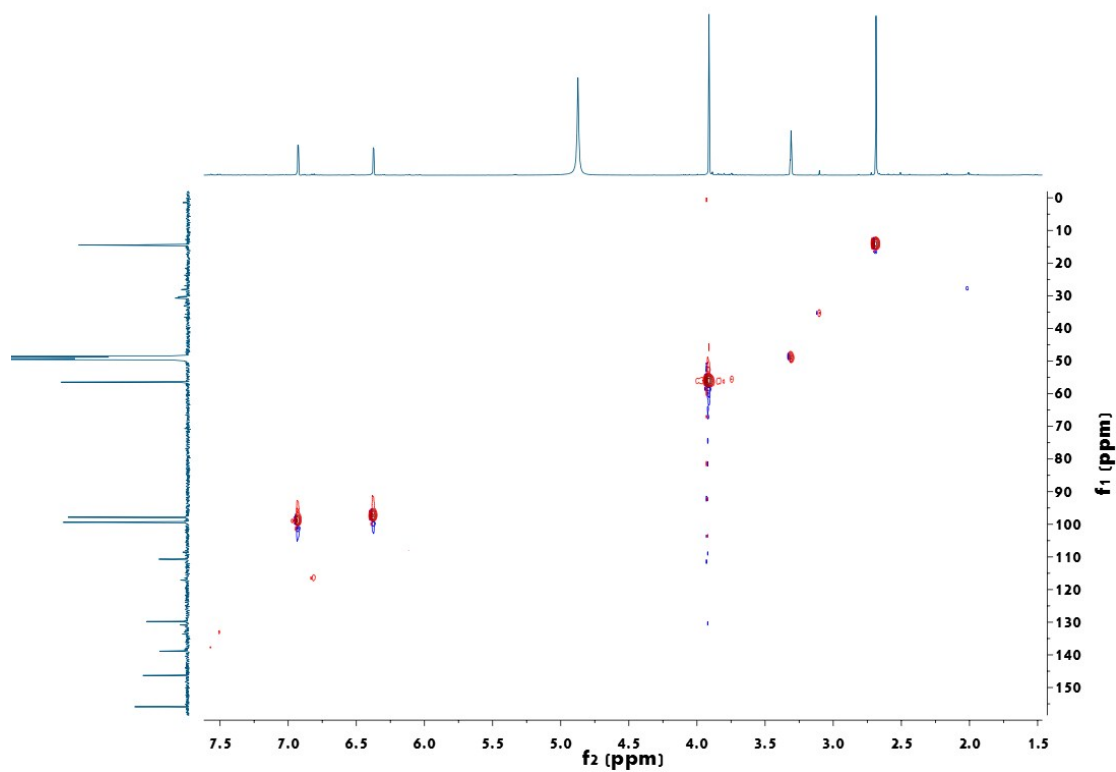

**Fig. S41**  $^1\text{H}$ - $^1\text{H}$  COSY spectrum of **16** in  $\text{MeOH-}d_4$ .

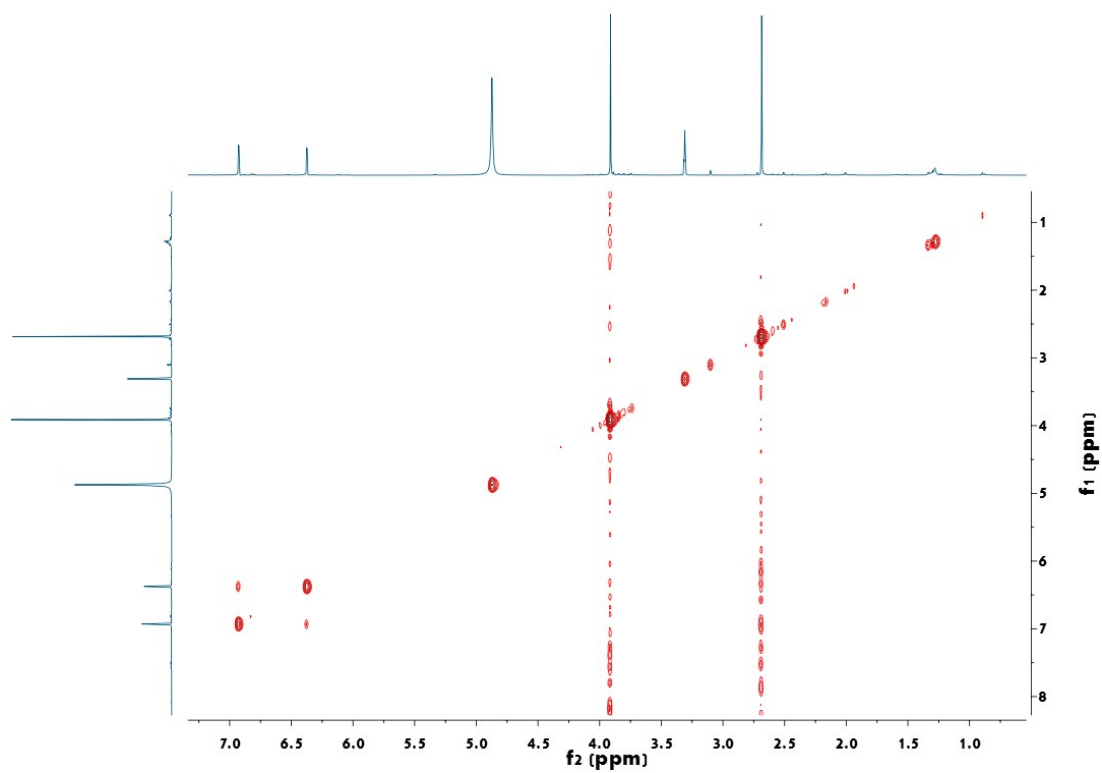

**Fig. S42** HMBC spectrum of **16** in  $\text{MeOH-}d_4$ .

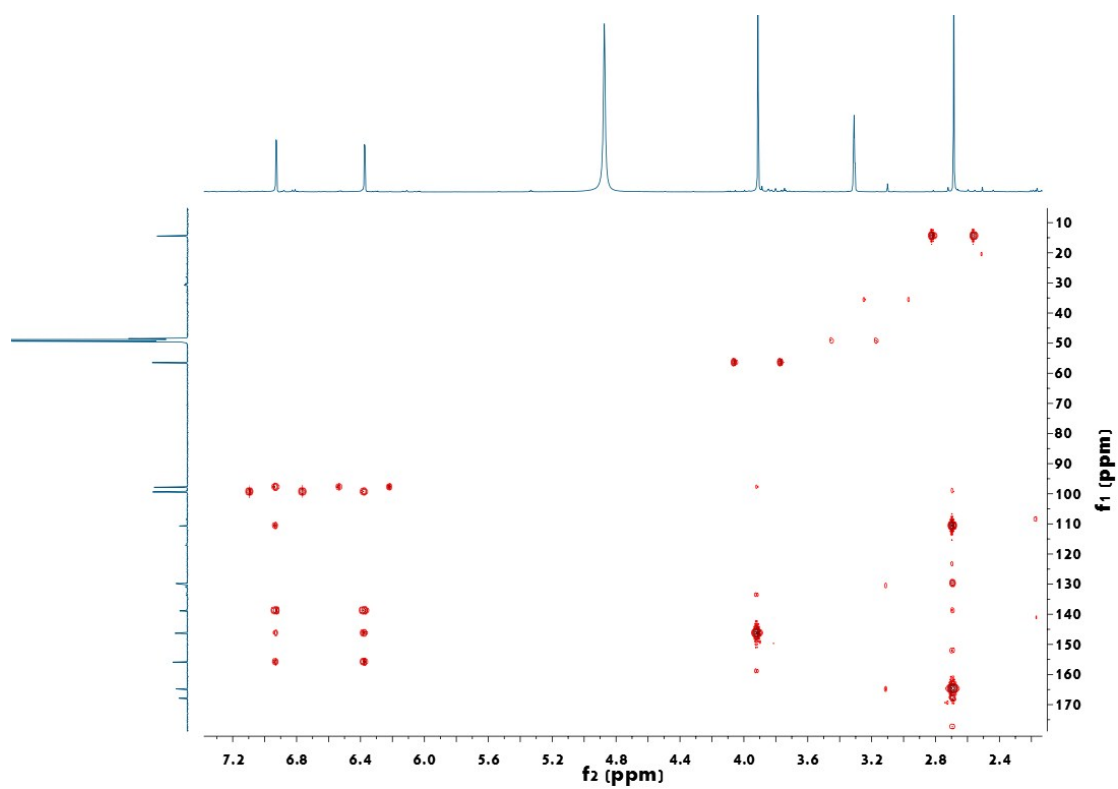



**Fig. S43** HRESIMS spectrum of **17**

D:\Data\2015\10\She zhigang\yx-a

11/2/2015 3:21:41 PM

LTO Orbitrap Elite

yx-a #5 RT: 0.09 AV: 1 NL: 9.26E5  
T: FTMS - c ESI Full ms [100.00-1000.00]

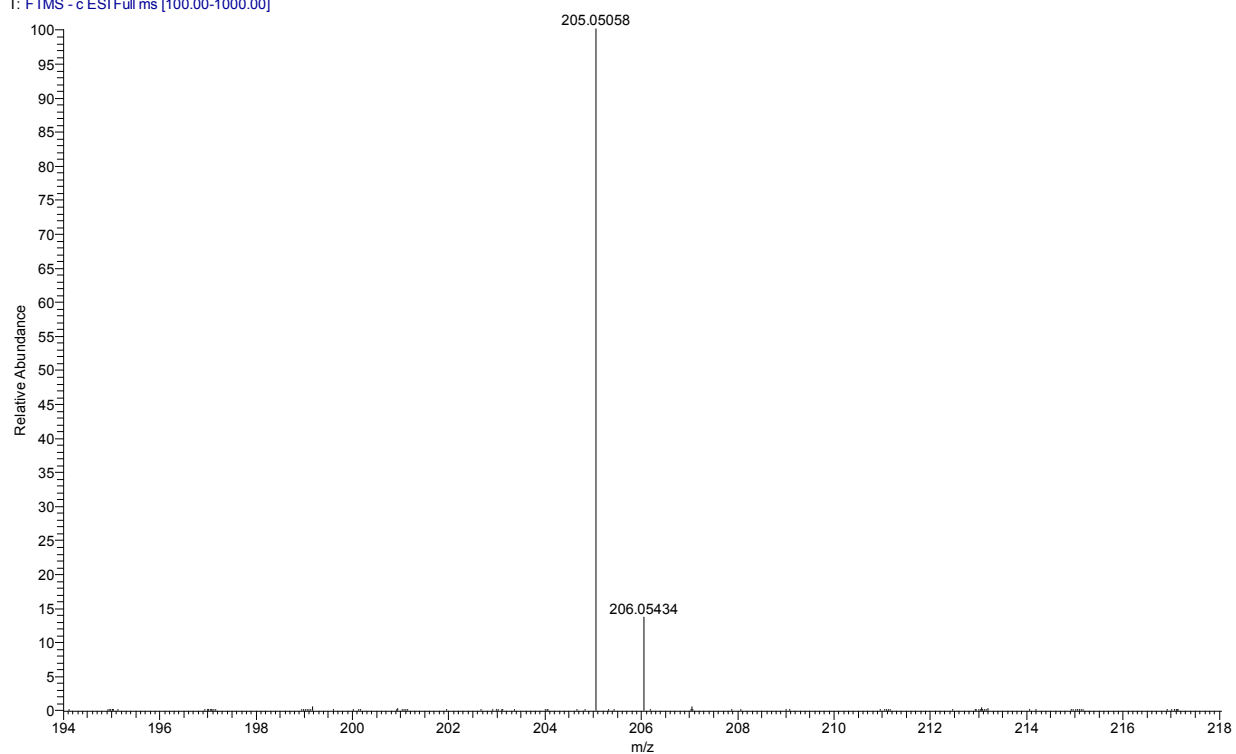

**Fig. S44**  $^1\text{H}$  NMR spectrum of **17** MeOH- $d_4$ .

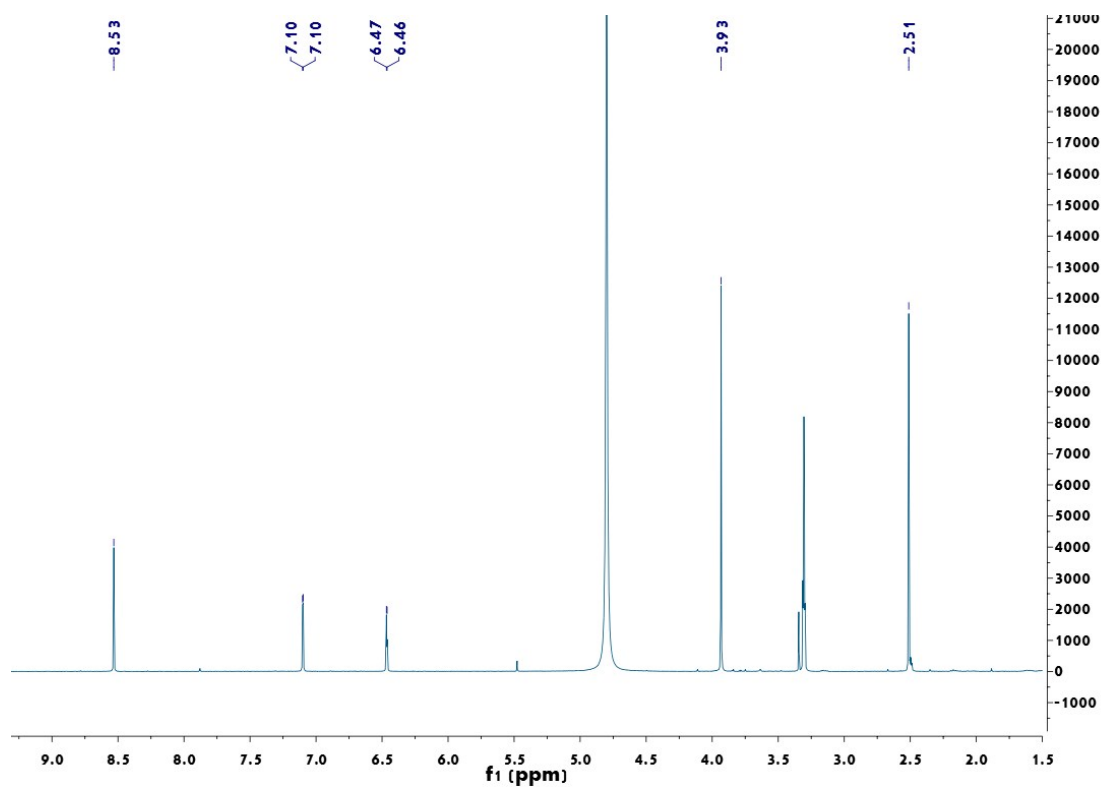

Fig. S45  $^{13}\text{C}$  NMR spectrum of **17** in  $\text{MeOH-}d_4$ .

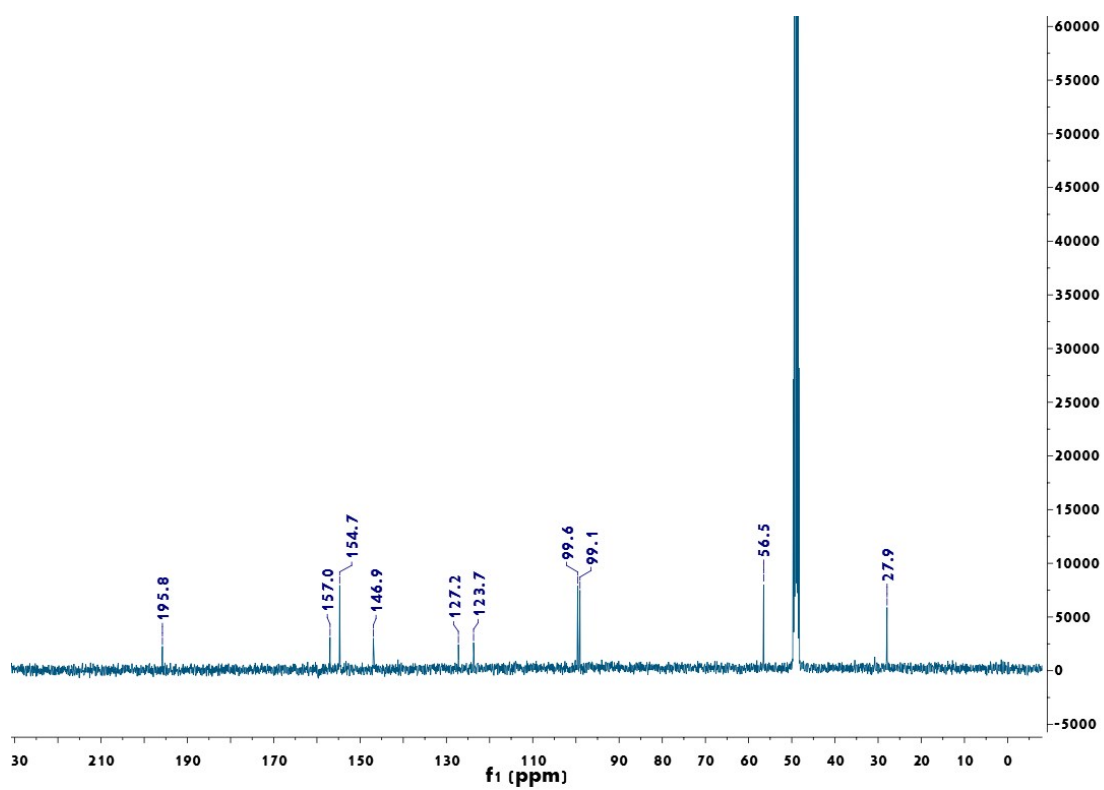

Fig. S46 HSQC spectrum of **17** in  $\text{MeOH-}d_4$ .

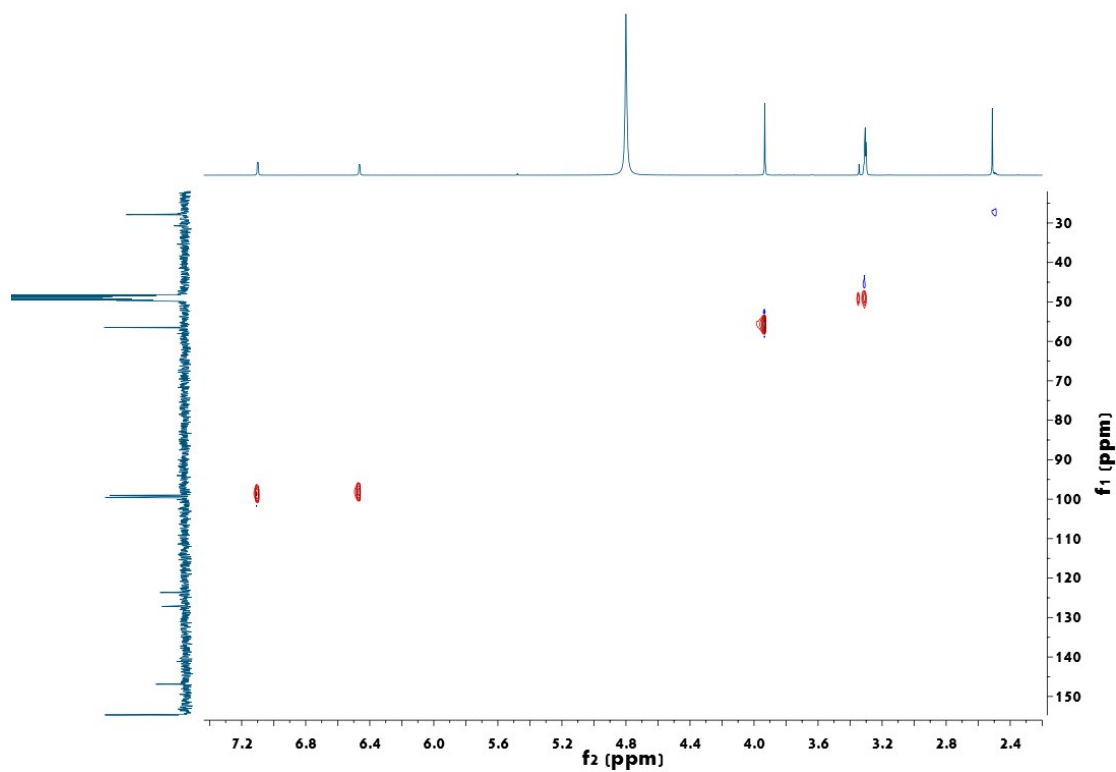

**Fig. S47**  $^1\text{H}$ - $^1\text{H}$  COSY spectrum of **17** in  $\text{MeOH-}d_4$ .

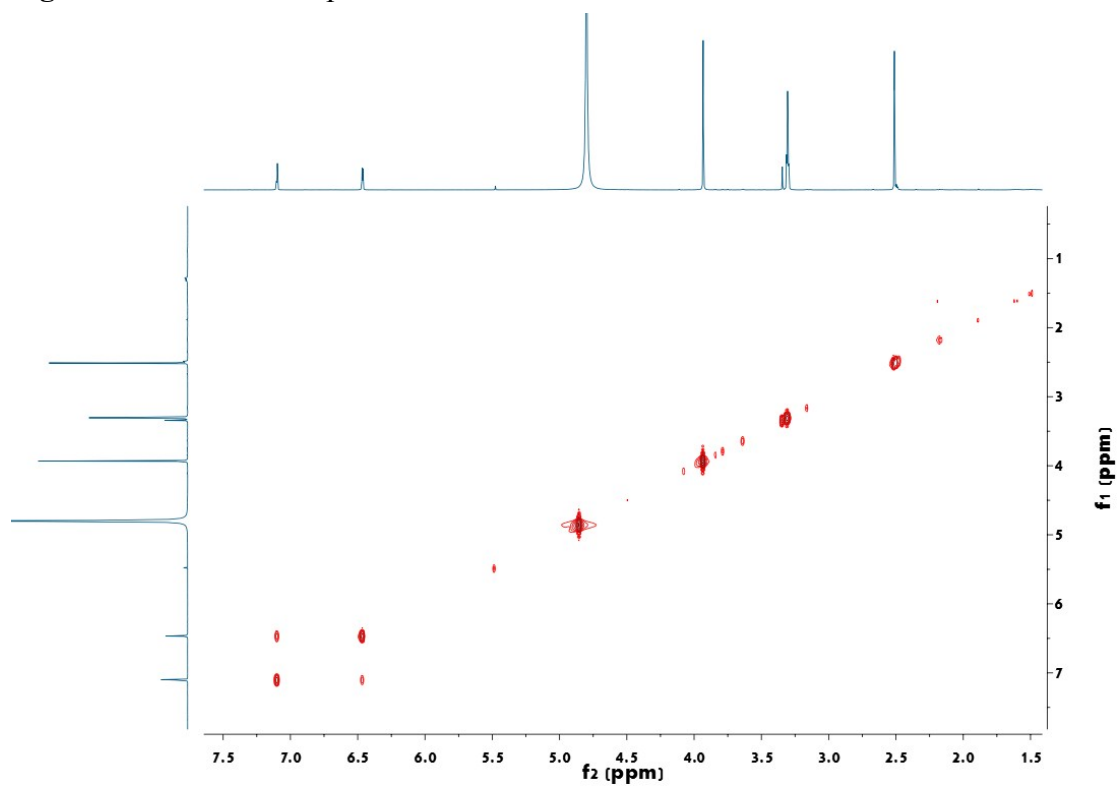

**Fig. S48** HMBC spectrum of **17** in  $\text{MeOH-}d_4$ .

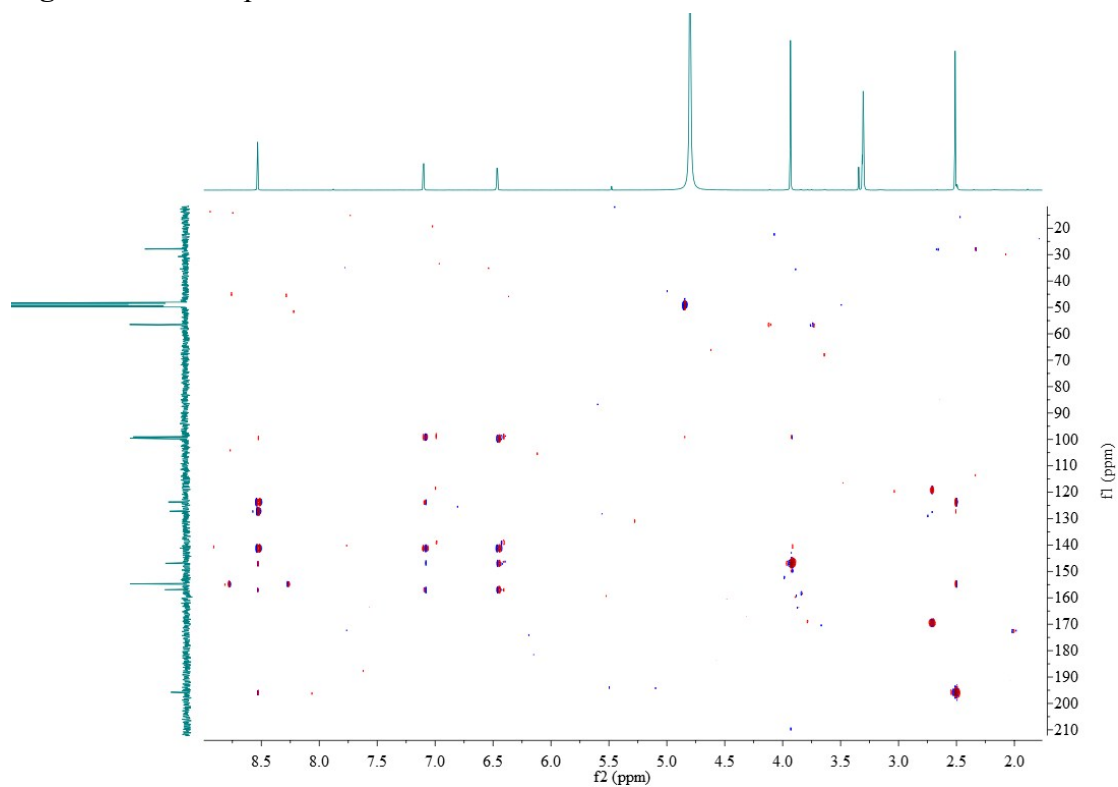

**Fig. S49**  $^1\text{H}$  NMR spectrum of **4a**  $\text{CDCl}_3$

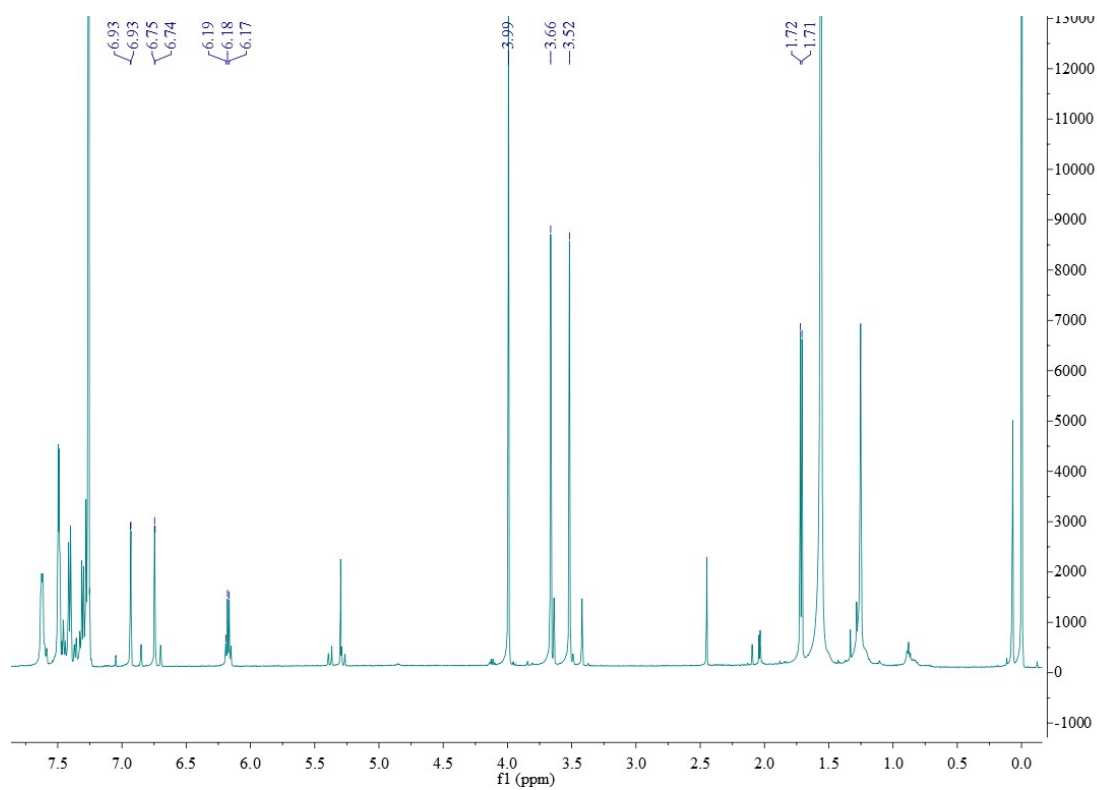

**Fig. S50**  $^1\text{H}$  NMR spectrum of **4b**  $\text{CDCl}_3$

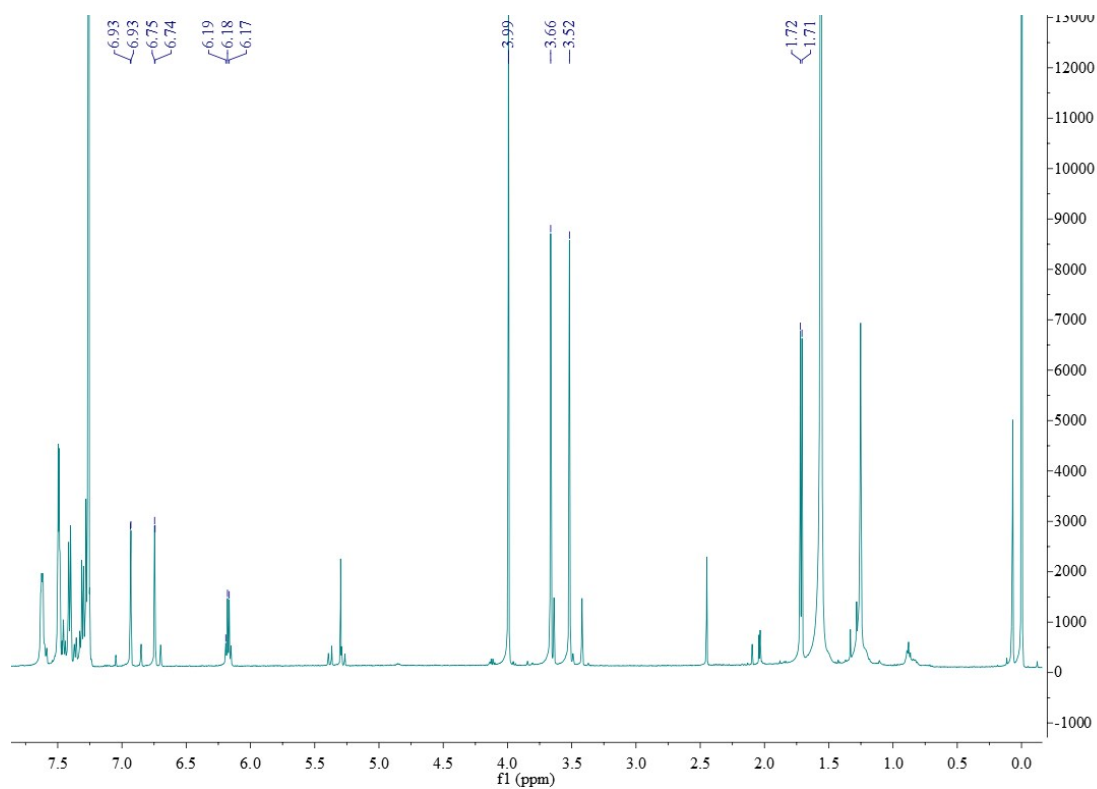

**Fig. S51**  $^1\text{H}$  NMR spectrum of **14a**  $\text{CDCl}_3$

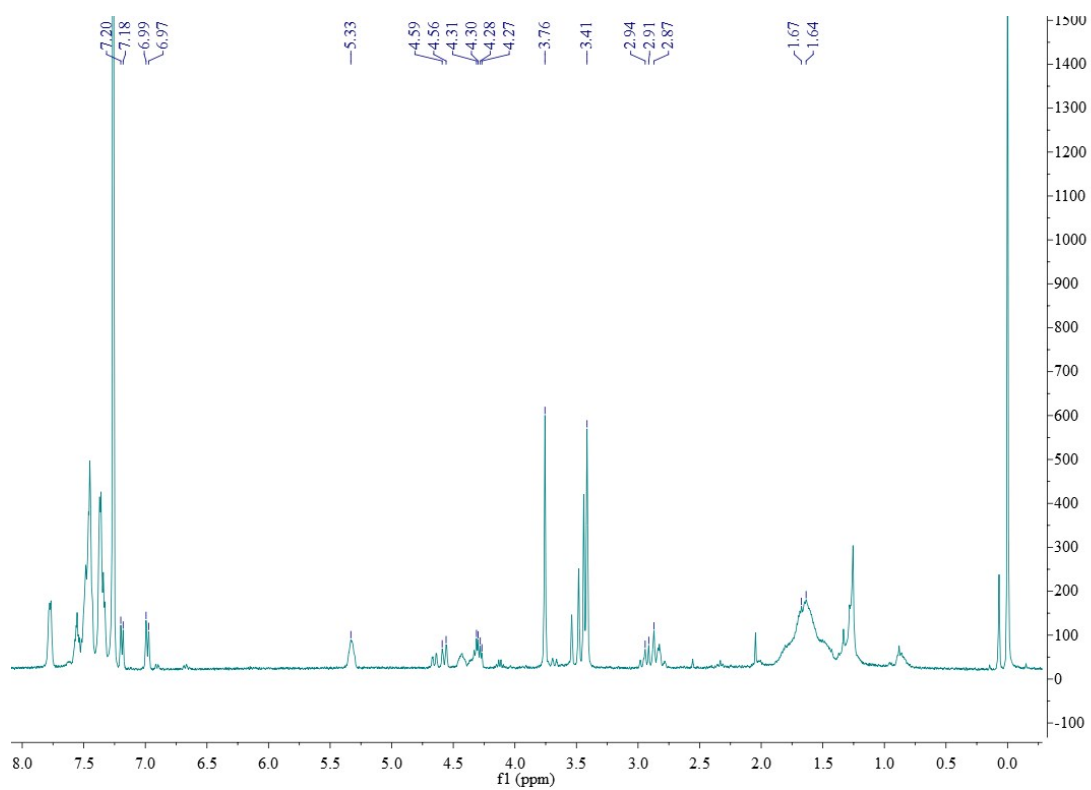

**Fig. S52**  $^1\text{H}$  NMR spectrum of **14b**  $\text{CDCl}_3$

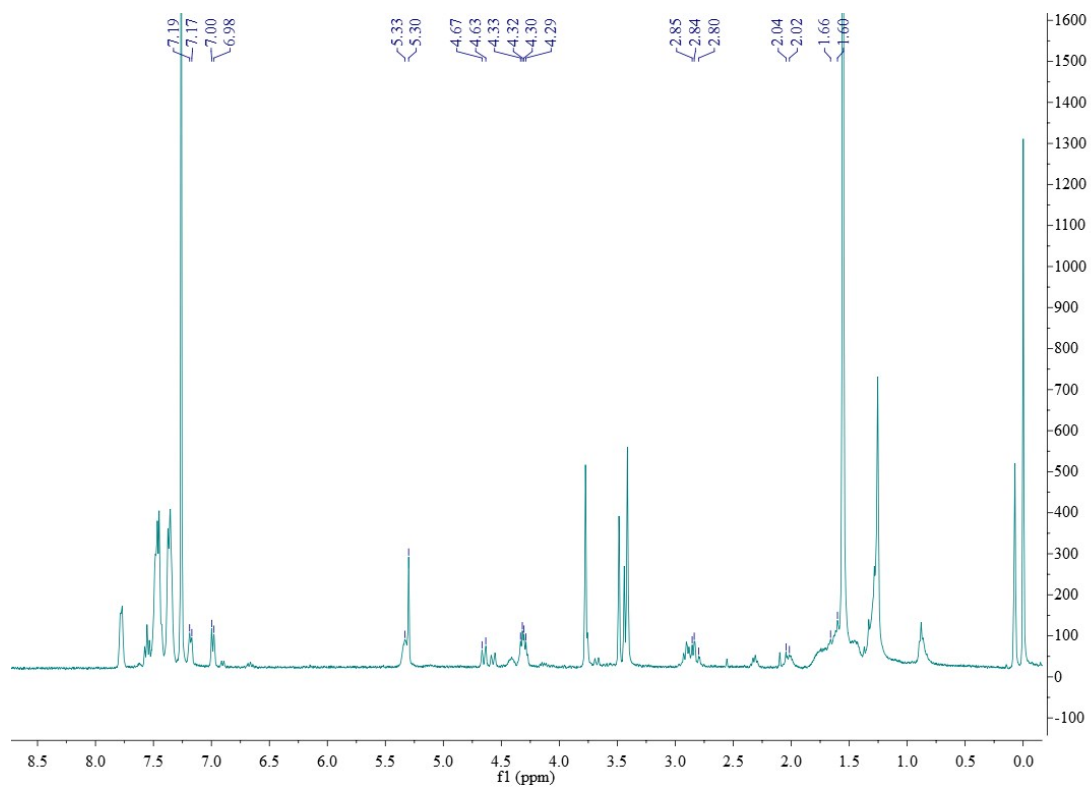

**Fig. S53**  $^1\text{H}$  NMR spectrum of **15a**  $\text{CDCl}_3$

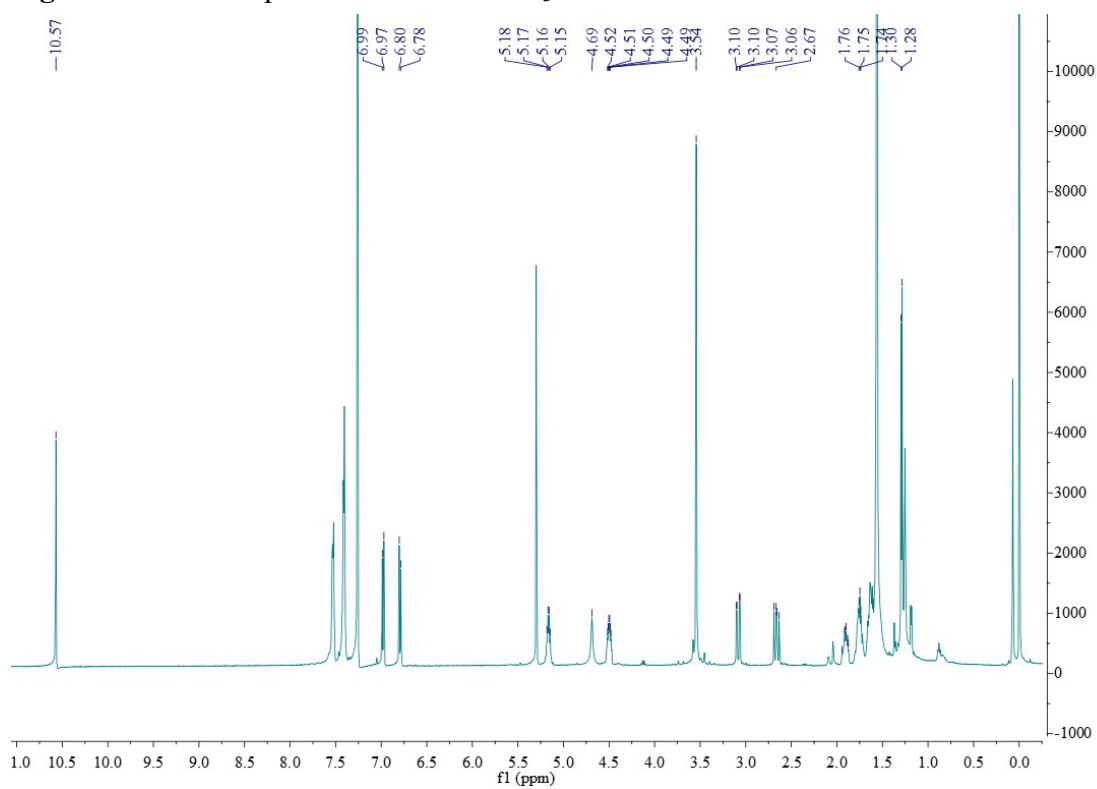

**Fig. S54**  $^1\text{H}$  NMR spectrum of **15b**  $\text{CDCl}_3$

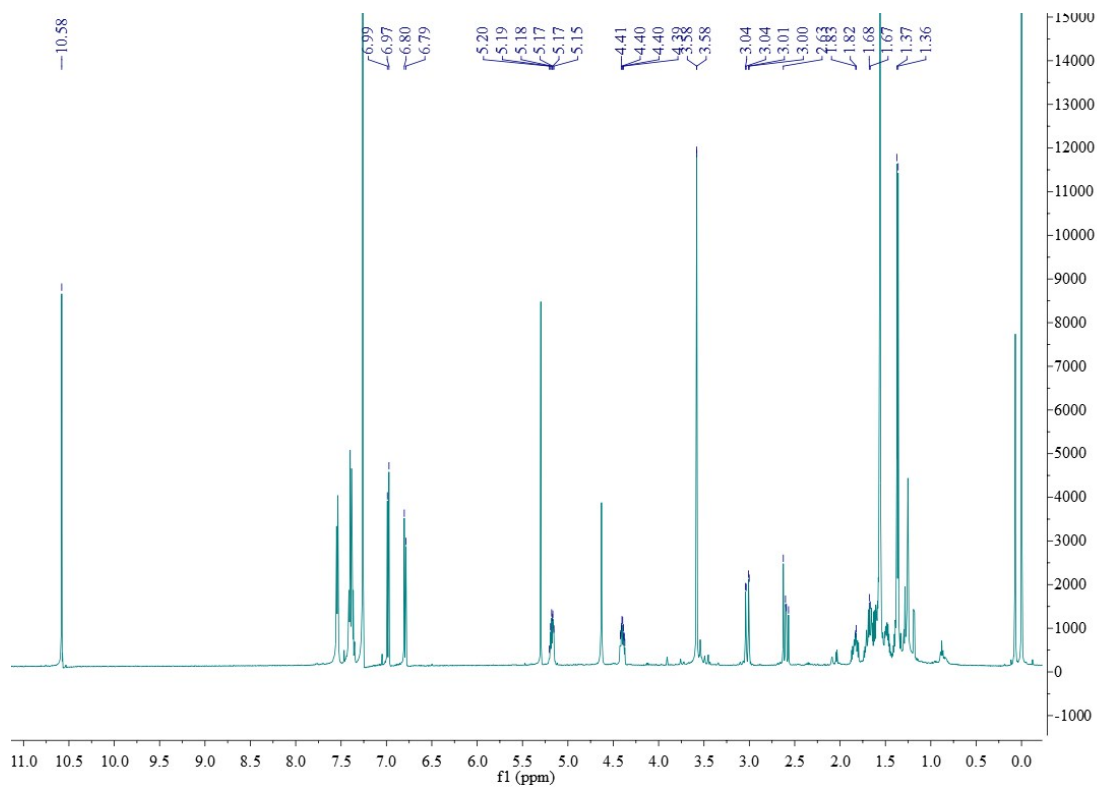

Fig. S55 X-ray crystallographic analysis of compound **5**

Colorless crystals of **5** were obtained by recrystallization from MeOH.  $C_{22}H_{20}O_{12}$ ,  $M_r = 476.38$ , orthorhombic,  $a = 7.0831(2)$  Å,  $b = 10.0442(2)$  Å,  $c = 28.1976(5)$  Å,  $\alpha = 90.00$ ,  $\beta = 90.00$ ,  $\gamma = 90.00$ ,  $V = 2006.09(8)$  Å<sup>3</sup>, space group  $P2_12_12_1$ ,  $Z = 4$ ,  $D_{calcd} = 1.286$  mg/m<sup>3</sup>,  $\mu(\text{Cu K}\alpha) = 1.577$  m<sup>-1</sup>, and  $F(000) = 992.0$ . Crystal dimensions:  $0.42 \times 0.32 \times 0.26$  mm<sup>3</sup>. Independent reflections: 3561 ( $R_{int} = 0.0307$ ). The final  $R_1$  values were 0.0286,  $\omega R_2 = 0.0722$  ( $I > 2\sigma(I)$ ). Flack parameter value was 0.06(13). CCDC number: 1444470. The single crystal X-ray diffraction data was collected at 123 K on an Agilent Gemini Ultra diffractometer with Cu K $\alpha$  radiation ( $\lambda = 1.54178$  Å). The structures were solved by direct methods (SHELXS-97) and refined using full-matrix least-squares difference Fourier techniques. Hydrogen atoms bonded to carbons were placed on the geometrically ideal positions by the “ride on” method. Hydrogen atoms bonded to oxygen were located by the difference Fourier method and were included in the calculation of structure factors with isotropic temperature factors. Crystallographic data for **5** has been deposited with the Cambridge Crystallographic Data Centre. Copies of the data can be obtained, free of charge, on application to the Director, CCDC, 12 Union Road, Cambridge CB2 1EZ, UK (fax: 44-(0)1223-336033, or e-mail: deposit@ccdc.cam.ac.uk).

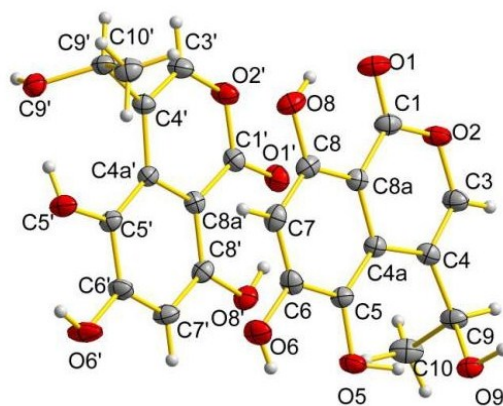

Fig.S55 X-ray crystallographic analysis of compound **5**.
